# Supplementary material
Source: MDPI journal article supplement (https://www.mdpi.com/2311-7524/5/3/65)
Supplement: s1 [file s1]

Table S1. Seed or fruit classification of diaspores
All data abstracted from the third update of the Seed Volume Dataset (available at https://www.mdpi.com/2306-5729/4/2/61 and at http://home.uevora.pt/~lsdias/SVDS_03plus.csv)
except the classification of diaspores as seeds or fruits which is a new addition.
SVDS# are numerical identifiers of entries and correspond to those used in the dataset sourced. More details in Ganh�o & Dias 2019, Data 4, 61 (doi:10.3390/data4020061).
SVDS#	SPECIES	FAMILY	DIASPORE
1	Abrus precatorius	Fabaceae	Seed
2	Abrus precatorius	Fabaceae	Seed
3	Acacia angustissima	Fabaceae	Seed
4	Acacia angustissima	Fabaceae	Seed
5	Acacia cyclops	Fabaceae	Seed
6	Acacia cyclops	Fabaceae	Seed
7	Acacia decurrens	Fabaceae	Seed
8	Acacia decurrens	Fabaceae	Seed
9	Acacia farnesiana	Fabaceae	Seed
10	Acacia farnesiana	Fabaceae	Seed
11	Acacia toruosa	Fabaceae	Seed
12	Acacia toruosa	Fabaceae	Seed
13	Adenanthera pavonina	Fabaceae	Seed
14	Adenanthera pavonina	Fabaceae	Seed
15	Adesmia incana	Fabaceae	Seed
16	Adesmia incana	Fabaceae	Seed
17	Aeschynomene indica	Fabaceae	Seed
18	Aeschynomene indica	Fabaceae	Seed
19	Afzelia quanzensis	Fabaceae	Seed
20	Afzelia quanzensis	Fabaceae	Seed
21	Albizia julibrissin	Fabaceae	Seed
22	Albizia julibrissin	Fabaceae	Seed
23	Albizia lebbeck	Fabaceae	Seed
24	Albizia lebbeck	Fabaceae	Seed
25	Alhagi maurorum	Fabaceae	Seed
26	Alhagi maurorum	Fabaceae	Seed
27	Alysicarpus vaginalis	Fabaceae	Seed
28	Alysicarpus vaginalis	Fabaceae	Seed
29	Amorpha canescens	Fabaceae	Seed
30	Amorpha canescens	Fabaceae	Seed
31	Amorpha fruticosa	Fabaceae	Seed
32	Amorpha fruticosa	Fabaceae	Seed
33	Amphicarpaea bracteata	Fabaceae	Seed
34	Amphicarpaea bracteata	Fabaceae	Seed
35	Andira inermis	Fabaceae	Seed
36	Anthyllis vulneraria	Fabaceae	Seed
37	Anthyllis vulneraria	Fabaceae	Seed
38	Apios americana	Fabaceae	Seed
39	Apios americana	Fabaceae	Seed
40	Arachis hypogaea	Fabaceae	Seed
41	Arachis hypogaea	Fabaceae	Seed
42	Astragalus canadensis	Fabaceae	Seed
43	Astragalus canadensis	Fabaceae	Seed
44	Astragalus crassicarpus	Fabaceae	Seed
45	Astragalus crassicarpus	Fabaceae	Seed
46	Astragalus drummondii	Fabaceae	Seed
47	Astragalus drummondii	Fabaceae	Seed
48	Astragalus purshii	Fabaceae	Seed
49	Astragalus purshii	Fabaceae	Seed
50	Baptisia australis	Fabaceae	Seed
51	Baptisia australis	Fabaceae	Seed
52	Bauhinia monarda	Fabaceae	Seed
53	Bauhinia monarda	Fabaceae	Seed
54	Bauhinia tomentosa	Fabaceae	Seed
55	Bauhinia tomentosa	Fabaceae	Seed
56	Bossiaea heterophylla	Fabaceae	Seed
57	Bossiaea heterophylla	Fabaceae	Seed
58	Brongniartia minutiflora	Fabaceae	Seed
59	Caesalpinia bonduc	Fabaceae	Seed
60	Caesalpinia bonduc	Fabaceae	Seed
61	Caesalpinia coriacea	Fabaceae	Seed
62	Caesalpinia coriacea	Fabaceae	Seed
63	Caesalpinia gilliesii	Fabaceae	Seed
64	Caesalpinia gilliesii	Fabaceae	Seed
65	Caesalpinia pulcherrima	Fabaceae	Seed
66	Caesalpinia pulcherrima	Fabaceae	Seed
67	Caesalpinia sappan	Fabaceae	Seed
68	Caesalpinia sappan	Fabaceae	Seed
69	Cajanus cajan	Fabaceae	Seed
70	Cajanus cajan	Fabaceae	Seed
71	Calliandra eriophylla	Fabaceae	Seed
72	Calliandra eriophylla	Fabaceae	Seed
73	Calliandra humilis	Fabaceae	Seed
74	Calliandra humilis	Fabaceae	Seed
75	Canavalia ensiformis	Fabaceae	Seed
76	Canavalia ensiformis	Fabaceae	Seed
77	Caragana arborescens	Fabaceae	Seed
78	Caragana arborescens	Fabaceae	Seed
79	Carmichaelia arenaria	Fabaceae	Seed
80	Carmichaelia arenaria	Fabaceae	Seed
81	Cassia fistula	Fabaceae	Seed
82	Cassia fistula	Fabaceae	Seed
83	Cassia javanica	Fabaceae	Seed
84	Cassia javanica	Fabaceae	Seed
85	Centrosema virginiana	Fabaceae	Seed
86	Centrosema virginiana	Fabaceae	Seed
87	Ceratonia siliqua	Fabaceae	Seed
88	Ceratonia siliqua	Fabaceae	Seed
89	Cercis canadensis	Fabaceae	Seed
90	Cercis canadensis	Fabaceae	Seed
91	Chamaecrista absus	Fabaceae	Seed
92	Chamaecrista absus	Fabaceae	Seed
93	Chamaecrista fasciculata	Fabaceae	Seed
94	Chamaecrista fasciculata	Fabaceae	Seed
95	Chamaecrista nictitans	Fabaceae	Seed
96	Chamaecrista nictitans	Fabaceae	Seed
97	Chapmannia floridana	Fabaceae	Seed
98	Chapmannia floridana	Fabaceae	Seed
99	Cicer arietinum	Fabaceae	Seed
100	Cicer arietinum	Fabaceae	Seed
101	Cladratis lutea	Fabaceae	Seed
102	Cladratis lutea	Fabaceae	Seed
103	Clitoria ternatea	Fabaceae	Seed
104	Clitoria ternatea	Fabaceae	Seed
105	Cologania angustifolia	Fabaceae	Seed
106	Cologania angustifolia	Fabaceae	Seed
107	Colutea arborescens	Fabaceae	Seed
108	Colutea arborescens	Fabaceae	Seed
109	Coronilla varia	Fabaceae	Seed
110	Coronilla varia	Fabaceae	Seed
111	Coursetia microphylla	Fabaceae	Seed
112	Coursetia microphylla	Fabaceae	Seed
113	Cracca caribaea	Fabaceae	Seed
114	Cracca caribaea	Fabaceae	Seed
115	Crotalaria pallida	Fabaceae	Seed
116	Crotalaria pallida	Fabaceae	Seed
117	Crotalaria sagittalis	Fabaceae	Seed
118	Crotalaria sagittalis	Fabaceae	Seed
119	Crotalaria spectabilis	Fabaceae	Seed
120	Crotalaria spectabilis	Fabaceae	Seed
121	Cyamopsis tetragonoloba	Fabaceae	Seed
122	Cyamopsis tetragonoloba	Fabaceae	Seed
123	Cytisus scoparius	Fabaceae	Seed
124	Cytisus scoparius	Fabaceae	Seed
125	Dalbergia sissoo	Fabaceae	Seed
126	Dalbergia sissoo	Fabaceae	Seed
127	Dalea leporina	Fabaceae	Seed
128	Dalea leporina	Fabaceae	Seed
129	Dalea purpurea	Fabaceae	Seed
130	Dalea purpurea	Fabaceae	Seed
131	Daviesia horrida	Fabaceae	Seed
132	Daviesia horrida	Fabaceae	Seed
133	Delonix regia	Fabaceae	Seed
134	Delonix regia	Fabaceae	Seed
135	Desmanthus illinoensis	Fabaceae	Seed
136	Desmanthus illinoensis	Fabaceae	Seed
137	Desmanthus leptolobus	Fabaceae	Seed
138	Desmanthus leptolobus	Fabaceae	Seed
139	Desmodium canadense	Fabaceae	Seed
140	Desmodium canadense	Fabaceae	Seed
141	Demondium glutinosum	Fabaceae	Seed
142	Demondium glutinosum	Fabaceae	Seed
143	Desmodium tortuosum	Fabaceae	Seed
144	Desmodium tortuosum	Fabaceae	Seed
145	Dichrostachys cinerea	Fabaceae	Seed
146	Dichrostachys cinerea	Fabaceae	Seed
147	Dioclea multiflora	Fabaceae	Seed
148	Dioclea multiflora	Fabaceae	Seed
149	Dioclea reflexa	Fabaceae	Seed
150	Dioclea reflexa	Fabaceae	Seed
151	Diphysa thurberi	Fabaceae	Seed
152	Diphysa thurberi	Fabaceae	Seed
153	Dipteryx odorata	Fabaceae	Seed
154	Dipteryx odorata	Fabaceae	Seed
155	Entada gigas	Fabaceae	Seed
156	Entada gigas	Fabaceae	Seed
157	Enterolobium cyclocarpum	Fabaceae	Seed
158	Errazurizia rotunda	Fabaceae	Seed
159	Errazurizia rotunda	Fabaceae	Seed
160	Erythrina crista-galli	Fabaceae	Seed
161	Erythrina crista-galli	Fabaceae	Seed
162	Erythrina herbacea	Fabaceae	Seed
163	Erythrina herbacea	Fabaceae	Seed
164	Euchresta japonica	Fabaceae	Seed
165	Euchresta japonica	Fabaceae	Seed
166	Eysenhardtia texana	Fabaceae	Seed
167	Eysenhardtia texana	Fabaceae	Seed
168	Galactia volubilis	Fabaceae	Seed
169	Galactia volubilis	Fabaceae	Seed
170	Galega officinalis	Fabaceae	Seed
171	Galega officinalis	Fabaceae	Seed
172	Genista tinctoria	Fabaceae	Seed
173	Genista tinctoria	Fabaceae	Seed
174	Genistidium dumosum	Fabaceae	Seed
175	Gleditsia aquatica	Fabaceae	Seed
176	Gleditsia aquatica	Fabaceae	Seed
177	Gleditsia triacanthos	Fabaceae	Seed
178	Gleditsia triacanthos	Fabaceae	Seed
179	Glottidium vesicaria	Fabaceae	Seed
180	Glottidium vesicaria	Fabaceae	Seed
181	Glycine max	Fabaceae	Seed
182	Glycine max	Fabaceae	Seed
183	Glycyrrhiza lepidota	Fabaceae	Seed
184	Glycyrrhiza lepidota	Fabaceae	Seed
185	Gymnocladus dioica	Fabaceae	Seed
186	Gymnocladus dioica	Fabaceae	Seed
187	Haematoxylum campechianum	Fabaceae	Seed
188	Haematoxylum campechianum	Fabaceae	Seed
189	Hedysarum alpinum	Fabaceae	Seed
190	Hedysarum alpinum	Fabaceae	Seed
191	Hoffmannseggia glauca	Fabaceae	Seed
192	Hoffmannseggia glauca	Fabaceae	Seed
193	Hymenaea courbaril	Fabaceae	Seed
194	Hymenaea courbaril	Fabaceae	Seed
195	Hypocalyptus sophorides	Fabaceae	Seed
196	Hypocalyptus sophorides	Fabaceae	Seed
197	Indigofera hirsuta	Fabaceae	Seed
198	Indigofera hirsuta	Fabaceae	Seed
199	Kennedia rubicunda	Fabaceae	Seed
200	Kennedia rubicunda	Fabaceae	Seed
201	Lablab purpureus	Fabaceae	Seed
202	Lablab purpureus	Fabaceae	Seed
203	Laburnum anagyroides	Fabaceae	Seed
204	Laburnum anagyroides	Fabaceae	Seed
205	Lathyrus hirsutus	Fabaceae	Seed
206	Lathyrus hirsutus	Fabaceae	Seed
207	Lathyrus latifolius	Fabaceae	Seed
208	Lathyrus odoratus	Fabaceae	Seed
209	Lathyrus odoratus	Fabaceae	Seed
210	Lathyrus odoratus	Fabaceae	Seed
211	Lathyrus sylvestris	Fabaceae	Seed
212	Lathyrus sylvestris	Fabaceae	Seed
213	Lens culinaris	Fabaceae	Seed
214	Lens culinaris	Fabaceae	Seed
215	Lespedeza cuneata	Fabaceae	Seed
216	Lespedeza cuneata	Fabaceae	Seed
217	Lespedeza stipulacea	Fabaceae	Seed
218	Lespedeza stipulacea	Fabaceae	Seed
219	Lespedeza striata	Fabaceae	Seed
220	Lespedeza striata	Fabaceae	Seed
221	Lespedeza virginica	Fabaceae	Seed
222	Lespedeza virginica	Fabaceae	Seed
223	Leucaena leucocephala	Fabaceae	Seed
224	Leucaena leucocephala	Fabaceae	Seed
225	Lonchocarpus violaceus	Fabaceae	Seed
226	Lonchocarpus violaceus	Fabaceae	Seed
227	Lotus corniculata	Fabaceae	Seed
228	Lotus corniculata	Fabaceae	Seed
229	Lotus purshianus	Fabaceae	Seed
230	Lotus purshianus	Fabaceae	Seed
231	Lotus uliginosus	Fabaceae	Seed
232	Lotus uliginosus	Fabaceae	Seed
233	Lupinus albus	Fabaceae	Seed
234	Lupinus albus	Fabaceae	Seed
235	Lupinus angustifolius	Fabaceae	Seed
236	Lupinus angustifolius	Fabaceae	Seed
237	Lupinus chamissonis	Fabaceae	Seed
238	Lupinus chamissonis	Fabaceae	Seed
239	Lupinus leucophyllus	Fabaceae	Seed
240	Lupinus leucophyllus	Fabaceae	Seed
241	Lupinus polyphyllus	Fabaceae	Seed
242	Lupinus polyphyllus	Fabaceae	Seed
243	Lysiloma sabicu	Fabaceae	Seed
244	Lysiloma sabicu	Fabaceae	Seed
245	Maackia amurensis	Fabaceae	Seed
246	Maackia amurensis	Fabaceae	Seed
247	Macroptilium lathyroides	Fabaceae	Seed
248	Macroptilium lathyroides	Fabaceae	Seed
249	Marina parryi	Fabaceae	Seed
250	Marina parryi	Fabaceae	Seed
251	Medicago arabica	Fabaceae	Seed
252	Medicago arabica	Fabaceae	Seed
253	Medicago lupulina	Fabaceae	Seed
254	Medicago lupulina	Fabaceae	Seed
255	Medicago orbicularis	Fabaceae	Seed
256	Medicago orbicularis	Fabaceae	Seed
257	Medicago polymorpha	Fabaceae	Seed
258	Medicago polymorpha	Fabaceae	Seed
259	Medicago sativa	Fabaceae	Seed
260	Medicago sativa	Fabaceae	Seed
261	Melilotus alba	Fabaceae	Seed
262	Melilotus alba	Fabaceae	Seed
263	Melilotus indica	Fabaceae	Seed
264	Melilotus indica	Fabaceae	Seed
265	Melilotus officinalis	Fabaceae	Seed
266	Melilotus officinalis	Fabaceae	Seed
267	Mimosa borealis	Fabaceae	Seed
268	Mimosa borealis	Fabaceae	Seed
269	Mimosa dysocarpa	Fabaceae	Seed
270	Mimosa dysocarpa	Fabaceae	Seed
271	Mimosa pigra	Fabaceae	Seed
272	Mimosa pigra	Fabaceae	Seed
273	Mimozyganthus carinatus	Fabaceae	Seed
274	Mimozyganthus carinatus	Fabaceae	Seed
275	Mucuna deeringiana	Fabaceae	Seed
276	Mucuna deeringiana	Fabaceae	Seed
277	Mucuna pruriens	Fabaceae	Seed
278	Mucuna pruriens	Fabaceae	Seed
279	Mucuna sloanei	Fabaceae	Seed
280	Mucuna sloanei	Fabaceae	Seed
281	Neptunia pubescens	Fabaceae	Seed
282	Neptunia pubescens	Fabaceae	Seed
283	Nissolia schottii	Fabaceae	Seed
284	Nissolia schottii	Fabaceae	Seed
285	Olneya tesota	Fabaceae	Seed
286	Olneya tesota	Fabaceae	Seed
287	Onobrychis viciifolia	Fabaceae	Seed
288	Onobrychis viciifolia	Fabaceae	Seed
289	Ononis spinosa	Fabaceae	Seed
290	Ononis spinosa	Fabaceae	Seed
291	Ophrestia radicosa	Fabaceae	Seed
292	Ophrestia radicosa	Fabaceae	Seed
293	Orbexilum pedunculatum	Fabaceae	Seed
294	Orbexilum pedunculatum	Fabaceae	Seed
295	Ornithopus sativus	Fabaceae	Seed
296	Ornithopus sativus	Fabaceae	Seed
297	Oxytropis campestris	Fabaceae	Seed
298	Oxytropis campestris	Fabaceae	Seed
299	Oxytropis sericea	Fabaceae	Seed
300	Oxytropis sericea	Fabaceae	Seed
301	Pachyrrhizus erosus	Fabaceae	Seed
302	Pachyrrhizus erosus	Fabaceae	Seed
303	Parkia javanica	Fabaceae	Seed
304	Parkia javanica	Fabaceae	Seed
305	Parkinsonia aculeata	Fabaceae	Seed
306	Parkinsonia aculeata	Fabaceae	Seed
307	Parryella filifolia	Fabaceae	Seed
308	Parryella filifolia	Fabaceae	Seed
309	Peltophorum pterocarpum	Fabaceae	Seed
310	Peltophorum pterocarpum	Fabaceae	Seed
311	Peteria thompsonae	Fabaceae	Seed
312	Peteria thompsonae	Fabaceae	Seed
313	Phaseolus coccineus	Fabaceae	Seed
314	Phaseolus coccineus	Fabaceae	Seed
315	Phaseolus lunatus	Fabaceae	Seed
316	Phaseolus lunatus	Fabaceae	Seed
317	Phaseolus vulgaris	Fabaceae	Seed
318	Phaseolus vulgaris	Fabaceae	Seed
319	Pickeringia montana	Fabaceae	Seed
320	Pickeringia montana	Fabaceae	Seed
321	Piscidia piscipula	Fabaceae	Seed
322	Piscidia piscipula	Fabaceae	Seed
323	Pisum sativum	Fabaceae	Seed
324	Pisum sativum	Fabaceae	Seed
325	Pithecellobium dulce	Fabaceae	Seed
326	Pithecellobium dulce	Fabaceae	Seed
327	Podalyria calyptrata	Fabaceae	Seed
328	Podalyria calyptrata	Fabaceae	Seed
329	Pongamia pinnata	Fabaceae	Seed
330	Pongamia pinnata	Fabaceae	Seed
331	Prosopis glandulosa	Fabaceae	Seed
332	Prosopis glandulosa	Fabaceae	Seed
333	Psoralea bituminosa	Fabaceae	Seed
334	Psoralea bituminosa	Fabaceae	Seed
335	Psoralea orbicularis	Fabaceae	Seed
336	Psoralea orbicularis	Fabaceae	Seed
337	Psorothamnus arborescens	Fabaceae	Seed
338	Psorothamnus arborescens	Fabaceae	Seed
339	Psorothamnus scoparius	Fabaceae	Seed
340	Psorothamnus scoparius	Fabaceae	Seed
341	Pueraria lobata	Fabaceae	Seed
342	Pueraria lobata	Fabaceae	Seed
343	Rhynchosia minima	Fabaceae	Seed
344	Rhynchosia minima	Fabaceae	Seed
345	Robinia pseudoacacia	Fabaceae	Seed
346	Robinia pseudoacacia	Fabaceae	Seed
347	Schrankia uncinata	Fabaceae	Seed
348	Schrankia uncinata	Fabaceae	Seed
349	Scorpiurus muricatus	Fabaceae	Seed
350	Scorpiurus muricatus	Fabaceae	Seed
351	Senna alata	Fabaceae	Seed
352	Senna alata	Fabaceae	Seed
353	Senna didymobotrya	Fabaceae	Seed
354	Senna didymobotrya	Fabaceae	Seed
355	Senna occidentalis	Fabaceae	Seed
356	Senna occidentalis	Fabaceae	Seed
357	Sesbania macrocarpa	Fabaceae	Seed
358	Sesbania macrocarpa	Fabaceae	Seed
359	Sophora tomentosa	Fabaceae	Seed
360	Sophora tomentosa	Fabaceae	Seed
361	Spartium junceum	Fabaceae	Seed
362	Spartium junceum	Fabaceae	Seed
363	Sphaerophysa salsula	Fabaceae	Seed
364	Sphaerophysa salsula	Fabaceae	Seed
365	Sphinctospermum constrictum	Fabaceae	Seed
366	Sphinctospermum constrictum	Fabaceae	Seed
367	Strophostyles helvola	Fabaceae	Seed
368	Strophostyles helvola	Fabaceae	Seed
369	Stylosanthes biflora	Fabaceae	Seed
370	Stylosanthes biflora	Fabaceae	Seed
371	Swartzia simplex	Fabaceae	Seed
372	Swartzia simplex	Fabaceae	Seed
373	Tamarindus indica	Fabaceae	Seed
374	Tamarindus indica	Fabaceae	Seed
375	Tephrosia virginiana	Fabaceae	Seed
376	Tephrosia virginiana	Fabaceae	Seed
377	Thermopsis villosa	Fabaceae	Seed
378	Thermopsis villosa	Fabaceae	Seed
379	Trifolium arvense	Fabaceae	Seed
380	Trifolium arvense	Fabaceae	Seed
381	Trifolium dubium	Fabaceae	Seed
382	Trifolium fragiferum	Fabaceae	Seed
383	Trifolium fragiferum	Fabaceae	Seed
384	Trifolium hirtum	Fabaceae	Seed
385	Trifolium hirtum	Fabaceae	Seed
386	Trifolium hybridum	Fabaceae	Seed
387	Trifolium hybridum	Fabaceae	Seed
388	Trifolium incarnatum	Fabaceae	Seed
389	Trifolium incarnatum	Fabaceae	Seed
390	Trifolium pratense	Fabaceae	Seed
391	Trifolium pratense	Fabaceae	Seed
392	Trifolium repens	Fabaceae	Seed
393	Trifolium repens	Fabaceae	Seed
394	Trifolium resupinatum	Fabaceae	Seed
395	Trifolium resupinatum	Fabaceae	Seed
396	Trifolium subterraneum	Fabaceae	Seed
397	Trifolium subterraneum	Fabaceae	Seed
398	Trigonella foenum-graceum	Fabaceae	Seed
399	Trigonella foenum-graceum	Fabaceae	Seed
400	Ulex europaeus	Fabaceae	Seed
401	Ulex europaeus	Fabaceae	Seed
402	Vicia benghalensis	Fabaceae	Seed
403	Vicia benghalensis	Fabaceae	Seed
404	Vicia faba	Fabaceae	Seed
405	Vicia faba	Fabaceae	Seed
406	Vicia grandiflora	Fabaceae	Seed
407	Vicia grandiflora	Fabaceae	Seed
408	Vicia leavenworthii	Fabaceae	Seed
409	Vicia leavenworthii	Fabaceae	Seed
410	Vicia nigricans	Fabaceae	Seed
411	Vicia nigricans	Fabaceae	Seed
412	Vicia pannonica	Fabaceae	Seed
413	Vicia pannonica	Fabaceae	Seed
414	Vicia sativa	Fabaceae	Seed
415	Vicia sativa	Fabaceae	Seed
416	Vicia sativa	Fabaceae	Seed
417	Vicia sativa	Fabaceae	Seed
418	Vicia villosa	Fabaceae	Seed
419	Vicia villosa	Fabaceae	Seed
420	Vicia villosa	Fabaceae	Seed
421	Vicia villosa	Fabaceae	Seed
422	Vigna angularis	Fabaceae	Seed
423	Vigna angularis	Fabaceae	Seed
424	Vigna radiata	Fabaceae	Seed
425	Vigna radiata	Fabaceae	Seed
426	Vigna unguiculata	Fabaceae	Seed
427	Vigna unguiculata	Fabaceae	Seed
428	Vigna unguiculata	Fabaceae	Seed
429	Vigna unguiculata	Fabaceae	Seed
430	Wisteria frutescens	Fabaceae	Seed
431	Wisteria frutescens	Fabaceae	Seed
432	Wisteria sinensis	Fabaceae	Seed
433	Wisteria sinensis	Fabaceae	Seed
434	Zornia bracteata	Fabaceae	Seed
435	Zornia bracteata	Fabaceae	Seed
436	Bidens bipinnata	Asteraceae	Fruit
437	Bidens bipinnata	Asteraceae	Fruit
438	Cicuta maculata	Apiaceae	Fruit
439	Cicuta maculata	Apiaceae	Fruit
440	Conium maculatum	Apiaceae	Fruit
441	Conium maculatum	Apiaceae	Fruit
442	Erodium cicutarium	Geraniaceae	Seed
443	Erodium cicutarium	Geraniaceae	Seed
446	Bidens frondosa	Asteraceae	Fruit
447	Bidens frondosa	Asteraceae	Fruit
448	Daucus carota	Apiaceae	Fruit
449	Daucus carota	Apiaceae	Fruit
450	Hypochoeris radicata	Asteraceae	Fruit
451	Hypochoeris radicata	Asteraceae	Fruit
452	Lychnis alba	Caryophyllaceae	Seed
453	Lychnis alba	Caryophyllaceae	Seed
454	Silene cucubalis	Caryophyllaceae	Seed
455	Silene cucubalis	Caryophyllaceae	Seed
456	Silene anthirrhina	Caryophyllaceae	Seed
457	Silene anthirrhina	Caryophyllaceae	Seed
458	Silene noctiflora	Caryophyllaceae	Seed
459	Silene noctiflora	Caryophyllaceae	Seed
460	Saponaria vaccaria	Caryophyllaceae	Seed
461	Saponaria vaccaria	Caryophyllaceae	Seed
462	Agrostemma githago	Caryophyllaceae	Seed
463	Agrostemma githago	Caryophyllaceae	Seed
464	Silene dichotoma	Caryophyllaceae	Seed
465	Silene dichotoma	Caryophyllaceae	Seed
466	Saponaria officinales	Caryophyllaceae	Seed
467	Saponaria officinales	Caryophyllaceae	Seed
468	Amaranthus albus	Amaranthaceae	Seed
469	Amaranthus albus	Amaranthaceae	Seed
470	Amaranthus graecizans	Amaranthaceae	Seed
471	Amaranthus graecizans	Amaranthaceae	Seed
472	Amaranthus retroflexus	Amaranthaceae	Seed
473	Amaranthus retroflexus	Amaranthaceae	Seed
474	Amaranthus spinosus	Amaranthaceae	Seed
475	Amaranthus spinosus	Amaranthaceae	Seed
478	Molluga verticillata	Aizoaceae	Seed
479	Molluga verticillata	Aizoaceae	Seed
482	Achillea millefolium	Asteraceae	Seed
483	Achillea millefolium	Asteraceae	Seed
484	Chenopodium hybridium	Chenopodiaceae	Fruit
485	Chenopodium hybridium	Chenopodiaceae	Fruit
486	Chenopodium album	Chenopodiaceae	Fruit
487	Chenopodium album	Chenopodiaceae	Fruit
488	Kochia scoparia	Chenopodiaceae	Seed
489	Kochia scoparia	Chenopodiaceae	Seed
490	Salsola kali	Chenopodiaceae	Fruit
491	Salsola kali	Chenopodiaceae	Fruit
492	Stellaria media	Caryophyllaceae	Seed
493	Stellaria media	Caryophyllaceae	Seed
494	Cerastium vulgatum	Caryophyllaceae	Seed
495	Cerastium vulgatum	Caryophyllaceae	Seed
496	Spergula arvensis	Caryophyllaceae	Seed
497	Spergula arvensis	Caryophyllaceae	Seed
498	Portulaca oleracea	Portulacaceae	Seed
499	Portulaca oleracea	Portulacaceae	Seed
500	Asclepias verticillata	Asclepiadaceae	Seed
501	Asclepias verticillata	Asclepiadaceae	Seed
502	Asclepias syriaca	Asclepiadaceae	Seed
503	Asclepias syriaca	Asclepiadaceae	Seed
504	Silphium terebinthinaceum	Asteraceae	Fruit
505	Silphium terebinthinaceum	Asteraceae	Fruit
506	Dipsacus sylvestris	Dipsacaceae	Fruit
507	Dipsacus sylvestris	Dipsacaceae	Fruit
508	Ambrosia artemisiifolia	Asteraceae	Seed
509	Ambrosia artemisiifolia	Asteraceae	Seed
510	Ambrosia trifida	Asteraceae	Seed
511	Ambrosia trifida	Asteraceae	Seed
512	Atriplex argentea	Chenopodiaceae	Seed
513	Atriplex argentea	Chenopodiaceae	Seed
514	Helianthus annuus	Asteraceae	Fruit
515	Helianthus annuus	Asteraceae	Fruit
516	Cirsium arvense	Asteraceae	Fruit
517	Cirsium arvense	Asteraceae	Fruit
518	Cirsium flodmani	Asteraceae	Fruit
519	Cirsium flodmani	Asteraceae	Fruit
520	Cirsium vulgare	Asteraceae	Fruit
521	Cirsium vulgare	Asteraceae	Fruit
522	Cirsium altissimum	Asteraceae	Fruit
523	Cirsium altissimum	Asteraceae	Fruit
524	Chrysanthemum leucanthemum	Asteraceae	Fruit
525	Chrysanthemum leucanthemum	Asteraceae	Fruit
526	Cichorium intybus	Asteraceae	Fruit
527	Cichorium intybus	Asteraceae	Fruit
528	Apocynum cannabinum	Asclepiadaceae	Seed
529	Apocynum cannabinum	Asclepiadaceae	Seed
530	Cyperus esculentus	Cyperaceae	Fruit
531	Cyperus esculentus	Cyperaceae	Fruit
532	Rumex acetosella	Polygonaceae	Fruit
533	Rumex acetosella	Polygonaceae	Fruit
534	Polygonum aviculare	Polygonaceae	Fruit
535	Polygonum aviculare	Polygonaceae	Fruit
536	Croton capitatus	Euphorbiaceae	Seed
537	Croton capitatus	Euphorbiaceae	Seed
538	Taraxacum officinale	Asteraceae	Fruit
539	Taraxacum officinale	Asteraceae	Fruit
540	Malva neglecta	Malvaceae	Fruit
541	Malva neglecta	Malvaceae	Fruit
542	Potentilla norvegica	Rosaceae	Fruit
543	Potentilla norvegica	Rosaceae	Fruit
544	Urtica dioica	Urticaceae	Fruit
545	Urtica dioica	Urticaceae	Fruit
546	Dioda teres	Rubiaceae	Fruit
547	Dioda teres	Rubiaceae	Fruit
548	Galium aparine	Rubiaceae	Fruit
549	Galium aparine	Rubiaceae	Fruit
550	Datura stramonium	Solanaceae	Seed
551	Datura stramonium	Solanaceae	Seed
552	Solanum rostratum	Solanaceae	Seed
553	Solanum rostratum	Solanaceae	Seed
554	Physalis heterophyla	Solanaceae	Seed
555	Physalis heterophyla	Solanaceae	Seed
556	Solanum carolinense	Solanaceae	Seed
557	Solanum carolinense	Solanaceae	Seed
558	Solanum nigrum	Solanaceae	Seed
559	Solanum nigrum	Solanaceae	Seed
560	Solanum dulcamara	Solanaceae	Seed
561	Solanum dulcamara	Solanaceae	Seed
562	Verbena bracteata	Verbenaceae	Fruit
563	Verbena bracteata	Verbenaceae	Fruit
564	Verbena hastata	Verbenaceae	Fruit
565	Verbena hastata	Verbenaceae	Fruit
566	Verbena stricta	Verbenaceae	Fruit
567	Verbena stricta	Verbenaceae	Fruit
568	Verbena urticifolia	Verbenaceae	Fruit
569	Verbena urticifolia	Verbenaceae	Fruit
570	Plantago aristata	Plantaginaceae	Seed
571	Plantago aristata	Plantaginaceae	Seed
572	Plantago lanceolata	Plantaginaceae	Seed
573	Plantago lanceolata	Plantaginaceae	Seed
574	Plantago rugelii	Plantaginaceae	Seed
575	Plantago rugelii	Plantaginaceae	Seed
576	Ranunculus abortivus	Ranunculaceae	Fruit
577	Ranunculus abortivus	Ranunculaceae	Fruit
578	Ranunculus acris	Ranunculaceae	Fruit
579	Ranunculus acris	Ranunculaceae	Fruit
580	Ranunculus bulbosus	Ranunculaceae	Fruit
581	Ranunculus bulbosus	Ranunculaceae	Fruit
582	Ranunculus sceleratus	Ranunculaceae	Fruit
583	Ranunculus sceleratus	Ranunculaceae	Fruit
584	Linaria vulgaris	Scrophulariaceae	Seed
585	Linaria vulgaris	Scrophulariaceae	Seed
586	Verbascum thapsus	Scrophulariaceae	Seed
587	Verbascum thapsus	Scrophulariaceae	Seed
588	Verbascum blattaria	Scrophulariaceae	Seed
589	Verbascum blattaria	Scrophulariaceae	Seed
590	Neslia paniculata	Brassicaceae	Seed
591	Neslia paniculata	Brassicaceae	Seed
592	Tragopogon pratensis	Asteraceae	Fruit
593	Tragopogon pratensis	Asteraceae	Fruit
594	Pastinaca sativa	Apiaceae	Fruit
595	Pastinaca sativa	Apiaceae	Fruit
596	Picris echioides	Asteraceae	Fruit
597	Picris echioides	Asteraceae	Fruit
598	Cynoglossum officinale	Boraginaceae	Seed
599	Cynoglossum officinale	Boraginaceae	Seed
600	Convolvulus arvensis	Convolvulaceae	Seed
601	Convolvulus arvensis	Convolvulaceae	Seed
602	Convolvulus sepium	Convolvulaceae	Seed
603	Convolvulus sepium	Convolvulaceae	Seed
604	Lithospermum arvense	Boraginaceae	Fruit
605	Lithospermum arvense	Boraginaceae	Fruit
606	Vernonia altissima	Asteraceae	Fruit
607	Vernonia altissima	Asteraceae	Fruit
608	Centaurea maculosa	Asteraceae	Fruit
609	Centaurea maculosa	Asteraceae	Fruit
610	Centaurea repens	Asteraceae	Fruit
611	Centaurea repens	Asteraceae	Fruit
612	Arctium minus	Asteraceae	Fruit
613	Arctium minus	Asteraceae	Fruit
614	Cannabis sativa	Cannabinaceae	Fruit
615	Cannabis sativa	Cannabinaceae	Fruit
618	Cuscuta pentagona	Convolvulaceae	Seed
619	Cuscuta pentagona	Convolvulaceae	Seed
620	Cuscuta planiflora	Convolvulaceae	Seed
621	Cuscuta planiflora	Convolvulaceae	Seed
622	Eupatorium serotinum	Asteraceae	Fruit
623	Eupatorium serotinum	Asteraceae	Fruit
624	Grindelia squarrosa	Asteraceae	Fruit
625	Grindelia squarrosa	Asteraceae	Fruit
626	Anthemis cotula	Asteraceae	Fruit
627	Anthemis cotula	Asteraceae	Fruit
628	Hieracium aurantiacum	Asteraceae	Fruit
629	Hieracium aurantiacum	Asteraceae	Fruit
630	Iva axillaris	Asteraceae	Fruit
631	Iva axillaris	Asteraceae	Fruit
632	Iva xanthifolia	Asteraceae	Fruit
633	Iva xanthifolia	Asteraceae	Fruit
634	Geranium carolinianum	Geraniaceae	Seed
635	Geranium carolinianum	Geraniaceae	Seed
636	Tanacetum vulgare	Asteraceae	Fruit
637	Tanacetum vulgare	Asteraceae	Fruit
638	Galinsoga parviflora	Asteraceae	Fruit
639	Galinsoga parviflora	Asteraceae	Fruit
640	Helenium tenuifolium	Asteraceae	Fruit
641	Helenium tenuifolium	Asteraceae	Fruit
642	Anagallis arvensis	Primulaceae	Seed
643	Anagallis arvensis	Primulaceae	Seed
644	Rudbeckia serotina	Asteraceae	Fruit
645	Rudbeckia serotina	Asteraceae	Fruit
646	Xanthium pensylvanicum	Asteraceae	Fruit
647	Xanthium pensylvanicum	Asteraceae	Fruit
650	Lactuca canadensis	Asteraceae	Fruit
651	Lactuca canadensis	Asteraceae	Fruit
652	Mirabilis nyctaginea	Nyctaginaceae	Fruit
653	Mirabilis nyctaginea	Nyctaginaceae	Fruit
654	Ipomoea hederacea	Convolvulaceae	Seed
655	Ipomoea hederacea	Convolvulaceae	Seed
656	Ipomoea pandurata	Convolvulaceae	Seed
657	Ipomoea pandurata	Convolvulaceae	Seed
658	Ipomoea purpurea	Convolvulaceae	Seed
659	Ipomoea purpurea	Convolvulaceae	Seed
660	Rudbeckia laciniata	Asteraceae	Fruit
661	Rudbeckia laciniata	Asteraceae	Fruit
662	Rumex crispus	Polygonaceae	Fruit
663	Rumex crispus	Polygonaceae	Fruit
664	Rumex obtusifolius	Polygonaceae	Fruit
665	Rumex obtusifolius	Polygonaceae	Fruit
666	Rumex altissimus	Polygonaceae	Fruit
667	Rumex altissimus	Polygonaceae	Fruit
668	Polygonum convolvulus	Polygonaceae	Fruit
669	Polygonum convolvulus	Polygonaceae	Fruit
670	Setaria lutescens	Poaceae	Fruit
671	Setaria lutescens	Poaceae	Fruit
672	Setaria viridis	Poaceae	Fruit
673	Setaria viridis	Poaceae	Fruit
674	Setaria faberii	Poaceae	Fruit
675	Setaria faberii	Poaceae	Fruit
676	Setaria verticillata	Poaceae	Fruit
677	Setaria verticillata	Poaceae	Fruit
678	Echinochloa crusgalli	Poaceae	Fruit
679	Echinochloa crusgalli	Poaceae	Fruit
680	Lactuca scariola	Asteraceae	Fruit
681	Lactuca scariola	Asteraceae	Fruit
682	Sonchus oleraceous	Asteraceae	Fruit
683	Sonchus oleraceous	Asteraceae	Fruit
684	Sonchus arvensis	Asteraceae	Fruit
685	Sonchus arvensis	Asteraceae	Fruit
686	Bromus tectorum	Poaceae	Fruit
687	Bromus tectorum	Poaceae	Fruit
688	Spita spartea	Poaceae	Fruit
689	Spita spartea	Poaceae	Fruit
690	Agropyrum repens	Poaceae	Fruit
691	Agropyrum repens	Poaceae	Fruit
692	Avena fatua	Poaceae	Fruit
693	Avena fatua	Poaceae	Fruit
694	Panicum capillare	Poaceae	Fruit
695	Panicum capillare	Poaceae	Fruit
696	Muhlenbergia schreberi	Poaceae	Fruit
697	Muhlenbergia schreberi	Poaceae	Fruit
698	Eragrostis cilianensis	Poaceae	Fruit
699	Eragrostis cilianensis	Poaceae	Fruit
700	Sida spinosa	Malvaceae	Seed
701	Sida spinosa	Malvaceae	Seed
702	Hordeum jubatum	Poaceae	Fruit
703	Hordeum jubatum	Poaceae	Fruit
704	Digitaria sanguinalis	Poaceae	Fruit
705	Digitaria sanguinalis	Poaceae	Fruit
706	Bromus secalinus	Poaceae	Fruit
707	Bromus secalinus	Poaceae	Fruit
708	Polygonum lapathifolium	Polygonaceae	Fruit
709	Polygonum persicaria	Polygonaceae	Fruit
710	Polygonum persicaria	Polygonaceae	Fruit
711	Polygonum pensylvanicum	Polygonaceae	Fruit
712	Polygonum pensylvanicum	Polygonaceae	Fruit
713	Polygonum hydropiper	Polygonaceae	Fruit
714	Polygonum hydropiper	Polygonaceae	Fruit
715	Abutilon theophrasti	Malvaceae	Seed
716	Abutilon theophrasti	Malvaceae	Seed
717	Rosa arkansana	Rosaceae	Fruit
718	Rosa arkansana	Rosaceae	Fruit
719	Dracocephalum parviflorum	Lamiaceae	Fruit
720	Dracocephalum parviflorum	Lamiaceae	Fruit
721	Brassica juncea	Brassicaceae	Seed
722	Brassica juncea	Brassicaceae	Seed
723	Brassica kaber	Brassicaceae	Seed
724	Brassica kaber	Brassicaceae	Seed
725	Raphanus raphanistrum	Brassicaceae	Seed
726	Raphanus raphanistrum	Brassicaceae	Seed
727	Brassica nigra	Brassicaceae	Seed
728	Brassica nigra	Brassicaceae	Seed
731	Barbarea vulgaris	Brassicaceae	Seed
732	Barbarea vulgaris	Brassicaceae	Seed
733	Camelina microcarpa	Brassicaceae	Seed
734	Camelina microcarpa	Brassicaceae	Seed
735	Camelina sativa	Brassicaceae	Seed
736	Camelina sativa	Brassicaceae	Seed
737	Capsella bursa-pastoris	Brassicaceae	Seed
738	Capsella bursa-pastoris	Brassicaceae	Seed
739	Lepidium virginicum	Brassicaceae	Seed
740	Lepidium virginicum	Brassicaceae	Seed
741	Lepidium campestre	Brassicaceae	Seed
742	Lepidium campestre	Brassicaceae	Seed
743	Cardaria draba	Brassicaceae	Seed
744	Cardaria draba	Brassicaceae	Seed
745	Euphorbia corollata	Euphorbiaceae	Seed
746	Euphorbia corollata	Euphorbiaceae	Seed
747	Euphorbia esula	Euphorbiaceae	Seed
748	Euphorbia esula	Euphorbiaceae	Seed
749	Euphorbia nutans	Euphorbiaceae	Seed
750	Euphorbia nutans	Euphorbiaceae	Seed
751	Euphorbia cyparissias	Euphorbiaceae	Seed
752	Euphorbia cyparissias	Euphorbiaceae	Seed
753	Cenchrus pauciflorus	Poaceae	Fruit
754	Cenchrus pauciflorus	Poaceae	Fruit
755	Tribulus terrestris	Zygophyllaceae	Seed
756	Tribulus terrestris	Zygophyllaceae	Seed
757	Sorghum halepense	Poaceae	Fruit
758	Sorghum halepense	Poaceae	Fruit
759	Glycyrrhiza lepidota	Fabaceae	Seed
760	Glycyrrhiza lepidota	Fabaceae	Seed
761	Astragulus canadensis	Fabaceae	Seed
762	Astragulus canadensis	Fabaceae	Seed
763	Oenthera biennis	Onagraceae	Seed
764	Oenthera biennis	Onagraceae	Seed
765	Nepeta cataria	Lamiaceae	Fruit
766	Nepeta cataria	Lamiaceae	Fruit
767	Lycopus virginicus	Lamiaceae	Fruit
768	Lycopus virginicus	Lamiaceae	Fruit
769	Thlaspi arvense	Brassicaceae	Seed
770	Thlaspi arvense	Brassicaceae	Seed
771	Oxalis stricta	Oxalidaceae	Seed
772	Oxalis stricta	Oxalidaceae	Seed
773	Argemone mexicana	Papaveraceae	Seed
774	Argemone mexicana	Papaveraceae	Seed
775	Eleusine indica	Poaceae	Fruit
776	Eleusine indica	Poaceae	Fruit
777	Conringa orientalis	Brassicaceae	Seed
778	Conringa orientalis	Brassicaceae	Seed
779	Erucastrum gallicum	Brassicaceae	Seed
780	Erucastrum gallicum	Brassicaceae	Seed
781	Sisymbrium altissimum	Brassicaceae	Seed
782	Sisymbrium altissimum	Brassicaceae	Seed
783	Sisymbrium officinale	Brassicaceae	Seed
784	Sisymbrium officinale	Brassicaceae	Seed
785	Euphorbia marginata	Euphorbiaceae	Seed
786	Euphorbia marginata	Euphorbiaceae	Seed
787	Teucrium canadense	Lamiaceae	Fruit
788	Teucrium canadense	Lamiaceae	Fruit
789	Hypericum perforatum	Clusiaceae	Seed
790	Hypericum perforatum	Clusiaceae	Seed
793	Galeopsis tetrahit	Lamiaceae	Fruit
794	Galeopsis tetrahit	Lamiaceae	Fruit
795	Medicago lupilina	Fabaceae	Seed
796	Medicago lupilina	Fabaceae	Seed
797	Cassina nictitans	Fabaceae	Seed
798	Cassina nictitans	Fabaceae	Seed
799	Vicia angustifolia	Fabaceae	Seed
800	Vicia angustifolia	Fabaceae	Seed
803	Leonurus cardiaca	Lamiaceae	Fruit
804	Leonurus cardiaca	Lamiaceae	Fruit
805	Prunella vulgaris	Lamiaceae	Fruit
806	Prunella vulgaris	Lamiaceae	Fruit
807	Salvia reflexa	Lamiaceae	Fruit
808	Salvia reflexa	Lamiaceae	Fruit
809	Physalis lanceolata	Solanaceae	Seed
810	Physalis lanceolata	Solanaceae	Seed
811	Anthemis arvensis	Asteraceae	Fruit
812	Anthemis arvensis	Asteraceae	Fruit
813	Anthemis arvensis	Asteraceae	Fruit
814	Anthemis arvensis	Asteraceae	Fruit
815	Amaranthus albus	Amaranthaceae	Seed
816	Amaranthus albus	Amaranthaceae	Seed
817	Amaranthus blitoides	Amaranthaceae	Seed
818	Amaranthus blitoides	Amaranthaceae	Seed
819	Amaranthus hybridus	Amaranthaceae	Seed
820	Amaranthus hybridus	Amaranthaceae	Seed
821	Amaranthus muricatus	Amaranthaceae	Seed
822	Amaranthus muricatus	Amaranthaceae	Seed
823	Amaranthus retroflexus	Amaranthaceae	Seed
824	Amaranthus retroflexus	Amaranthaceae	Seed
825	Amaranthus silvester	Amaranthaceae	Seed
826	Amaranthus silvester	Amaranthaceae	Seed
827	Ambrosia artemisiaefolia	Asteraceae	Seed
828	Ambrosia artemisiaefolia	Asteraceae	Seed
829	Xanthium orientale	Asteraceae	Fruit
830	Xanthium orientale	Asteraceae	Fruit
831	Xanthium spinosum	Asteraceae	Fruit
832	Xanthium spinosum	Asteraceae	Fruit
833	Xanthium strumarium	Asteraceae	Fruit
834	Xanthium strumarium	Asteraceae	Fruit
835	Anchusa azurea	Boraginaceae	Fruit
836	Anchusa azurea	Boraginaceae	Fruit
837	Asperugo procumbens	Boraginaceae	Fruit
838	Asperugo procumbens	Boraginaceae	Fruit
839	Borrago officinalis	Boraginaceae	Fruit
840	Borrago officinalis	Boraginaceae	Fruit
841	Cerinthe major	Boraginaceae	Fruit
842	Echium plantagineum	Boraginaceae	Fruit
843	Heliotropium curassavicum	Boraginaceae	Fruit
844	Heliotropium curassavicum	Boraginaceae	Fruit
845	Heliotropium europaeum	Boraginaceae	Fruit
846	Heliotropium europaeum	Boraginaceae	Fruit
847	Lithospermum arvense	Boraginaceae	Fruit
848	Lithospermum arvense	Boraginaceae	Fruit
849	Myosotis arvense	Boraginaceae	Fruit
850	Myosotis arvense	Boraginaceae	Fruit
851	Agrostemma githago	Caryophyllaceae	Seed
852	Agrostemma githago	Caryophyllaceae	Seed
853	Arenaria cerastioides	Caryophyllaceae	Seed
854	Arenaria cerastioides	Caryophyllaceae	Seed
855	Cerastium glomeratum	Caryophyllaceae	Seed
856	Cerastium glomeratum	Caryophyllaceae	Seed
857	Silene inflata	Caryophyllaceae	Seed
858	Silene inflata	Caryophyllaceae	Seed
859	Spergula arvensis	Caryophyllaceae	Seed
860	Spergula arvensis	Caryophyllaceae	Seed
861	Spergularia rubra	Caryophyllaceae	Seed
862	Spergularia rubra	Caryophyllaceae	Seed
863	Stellaria media	Caryophyllaceae	Seed
864	Stellaria media	Caryophyllaceae	Seed
865	Vaccaria pyramidata	Caryophyllaceae	Seed
866	Vaccaria pyramidata	Caryophyllaceae	Seed
867	Atriplex hastatus	Chenopodiaceae	Seed
868	Atriplex hastatus	Chenopodiaceae	Seed
869	Atriplex patula	Chenopodiaceae	Seed
870	Atriplex patula	Chenopodiaceae	Seed
871	Beta macrocarpa	Chenopodiaceae	Fruit
872	Chenopodium album	Chenopodiaceae	Fruit
873	Chenopodium botrys	Chenopodiaceae	Fruit
874	Chenopodium botrys	Chenopodiaceae	Fruit
875	Chenopodium murale	Chenopodiaceae	Fruit
876	Chenopodium murale	Chenopodiaceae	Fruit
877	Chenopodium vulvaria	Chenopodiaceae	Fruit
878	Chenopodium vulvaria	Chenopodiaceae	Fruit
879	Kochia scoparia	Chenopodiaceae	Seed
880	Kochia scoparia	Chenopodiaceae	Seed
881	Salsola kali	Chenopodiaceae	Fruit
882	Achillea millefolium	Asteraceae	Seed
883	Achillea millefolium	Asteraceae	Seed
884	Anacyclus clavatus	Asteraceae	Fruit
885	Anacyclus clavatus	Asteraceae	Fruit
886	Anacyclus radiatus	Asteraceae	Fruit
887	Anacyclus radiatus	Asteraceae	Fruit
888	Anthemis arvensis	Asteraceae	Fruit
889	Anthemis arvensis	Asteraceae	Fruit
890	Anthemis mixta	Asteraceae	Fruit
891	Anthemis mixta	Asteraceae	Fruit
892	Anthemis praecox	Asteraceae	Fruit
893	Anthemis praecox	Asteraceae	Fruit
894	Calendula arvensis	Asteraceae	Fruit
895	Calendula arvensis	Asteraceae	Fruit
896	Centaurea calcitrapa	Asteraceae	Fruit
897	Centaurea calcitrapa	Asteraceae	Fruit
898	Centaurea cyanus	Asteraceae	Fruit
899	Centaurea cyanus	Asteraceae	Fruit
900	Chondrilla juncea	Asteraceae	Fruit
901	Chrysanthemum coronarium	Asteraceae	Fruit
902	Chrysanthemum coronarium	Asteraceae	Fruit
903	Cichorium intybus	Asteraceae	Fruit
904	Cichorium intybus	Asteraceae	Fruit
905	Cirsium arvense	Asteraceae	Fruit
906	Cirsium arvense	Asteraceae	Fruit
907	Cotula coronopifolia	Asteraceae	Fruit
908	Erigeron crispum	Asteraceae	Fruit
909	Erigeron crispum	Asteraceae	Fruit
910	Galinsoga parviflora	Asteraceae	Fruit
911	Lactuca scariola	Asteraceae	Fruit
912	Lactuca scariola	Asteraceae	Fruit
913	Microlonchus salmanticus	Asteraceae	Fruit
914	Picris echioides	Asteraceae	Fruit
915	Podospermum laciniatum	Asteraceae	Fruit
916	Senecio vulgaris	Asteraceae	Fruit
917	Senecio vulgaris	Asteraceae	Fruit
918	Silybum marianum	Asteraceae	Fruit
919	Sonchus asper	Asteraceae	Fruit
920	Sonchus asper	Asteraceae	Fruit
921	Taraxacum officinale	Asteraceae	Fruit
922	Taraxacum officinale	Asteraceae	Fruit
923	Convolvulus arvensis	Convolvulaceae	Seed
924	Convolvulus arvensis	Convolvulaceae	Seed
925	Biscutella auriculata	Brassicaceae	Seed
926	Brassica nigra	Brassicaceae	Seed
927	Capsella bursa-pastoris	Brassicaceae	Seed
928	Capsella bursa-pastoris	Brassicaceae	Seed
929	Conringia orientalis	Brassicaceae	Seed
930	Conringia orientalis	Brassicaceae	Seed
931	Coronopus didymus	Brassicaceae	Seed
932	Coronopus didymus	Brassicaceae	Seed
933	Coronopus procumbens	Brassicaceae	Seed
936	Diplotaxis erucoides	Brassicaceae	Seed
937	Diplotaxis erucoides	Brassicaceae	Seed
938	Diplotaxis virgata	Brassicaceae	Seed
939	Diplotaxis virgata	Brassicaceae	Seed
940	Eruca vesicaria	Brassicaceae	Seed
941	Eruca vesicaria	Brassicaceae	Seed
942	Cardaria draba	Brassicaceae	Seed
943	Malcolmia africana	Brassicaceae	Seed
944	Malcolmia africana	Brassicaceae	Seed
945	Raphanus raphanistrum	Brassicaceae	Seed
946	Raphanus raphanistrum	Brassicaceae	Seed
947	Rapistrum rugosum	Brassicaceae	Seed
948	Rapistrum rugosum	Brassicaceae	Seed
949	Sinapis alba	Brassicaceae	Seed
950	Sinapis alba	Brassicaceae	Seed
951	Sinapis arvensis	Brassicaceae	Seed
952	Sinapis arvensis	Brassicaceae	Seed
953	Sisymbium crassifolia	Brassicaceae	Seed
954	Sisymbium crassifolia	Brassicaceae	Seed
955	Sisymbrium irio	Brassicaceae	Seed
956	Sisymbrium irio	Brassicaceae	Seed
957	Sisymbrium runcinatun	Brassicaceae	Seed
958	Sisymbrium runcinatun	Brassicaceae	Seed
959	Sisymbrium sophia	Brassicaceae	Seed
960	Sisymbrium sophia	Brassicaceae	Seed
961	Thlaspi arvense	Brassicaceae	Seed
962	Thlaspi arvense	Brassicaceae	Seed
964	Ecbalium elaterium	Cucurbitaceae	Seed
965	Ecbalium elaterium	Cucurbitaceae	Seed
966	Cuscuta europea	Convolvulaceae	Seed
967	Cuscuta europea	Convolvulaceae	Seed
968	Cyperus rotundus	Cyperaceae	Fruit
969	Cyperus rotundus	Cyperaceae	Fruit
970	Scabiosa maritima	Dipsacaceae	Fruit
971	Scabiosa stellata	Dipsacaceae	Fruit
972	Carex abrupta	Cyperaceae	Fruit
973	Carex abrupta	Cyperaceae	Fruit
974	Chrozophora tinctoria	Euphorbiaceae	Seed
975	Euphorbia chamaesyce	Euphorbiaceae	Seed
976	Euphorbia helioscopia	Euphorbiaceae	Seed
977	Mercurialis annua	Euphorbiaceae	Seed
978	Fumaria officinalis	Papaveraceae	Seed
979	Fumaria officinalis	Papaveraceae	Seed
980	Erodium ciconium	Geraniaceae	Seed
981	Erodium cicutarium	Geraniaceae	Seed
982	Geranium molle	Geraniaceae	Seed
983	Geranium molle	Geraniaceae	Seed
984	Aegilops ovata	Poaceae	Fruit
985	Aegilops ovata	Poaceae	Fruit
986	Aegilops triuncalis	Poaceae	Fruit
987	Aegilops triuncalis	Poaceae	Fruit
989	Alopecurus agrestis	Poaceae	Fruit
990	Arrhenatherum bulbosum	Poaceae	Fruit
991	Arrhenatherum bulbosum	Poaceae	Fruit
993	Scorzonera hispanica	Asteraceae	Fruit
994	Scorzonera hispanica	Asteraceae	Fruit
996	Cynodon dactylon	Poaceae	Fruit
997	Cynodon dactylon	Poaceae	Fruit
998	Dactylis glomerata	Poaceae	Fruit
999	Dactylis glomerata	Poaceae	Fruit
1000	Echinochloa colona	Poaceae	Fruit
1001	Echinochloa crus-galli	Poaceae	Fruit
1002	Echinochloa crus-galli	Poaceae	Fruit
1003	Lolium multiflorum	Poaceae	Fruit
1004	Paspalum dilatatum	Poaceae	Fruit
1005	Paspalum dilatatum	Poaceae	Fruit
1006	Phalaris brachystachys	Poaceae	Fruit
1007	Phalaris minor	Poaceae	Fruit
1008	Phalaris minor	Poaceae	Fruit
1009	Phalaris paradoxa	Poaceae	Fruit
1010	Phalaris paradoxa	Poaceae	Fruit
1011	Poa annua	Poaceae	Fruit
1012	Poa annua	Poaceae	Fruit
1013	Setaria glauca	Poaceae	Fruit
1014	Setaria glauca	Poaceae	Fruit
1015	Setaria verticillata	Poaceae	Fruit
1016	Setaria verticillata	Poaceae	Fruit
1017	Sorghum halepense	Poaceae	Fruit
1018	Sorghum halepense	Poaceae	Fruit
1019	Juncus bufonius	Juncaceae	Seed
1020	Juncus bufonius	Juncaceae	Seed
1023	Lamium amplexicaule	Lamiaceae	Fruit
1024	Lamium amplexicaule	Lamiaceae	Fruit
1025	Salvia verbenaca	Lamiaceae	Fruit
1026	Salvia verbenaca	Lamiaceae	Fruit
1027	Stachys annua	Lamiaceae	Fruit
1028	Stachys annua	Lamiaceae	Fruit
1029	Muscari comosum	Liliaceae	Seed
1030	Muscari comosum	Liliaceae	Seed
1031	Lythrum junceum	Lythraceae	Seed
1032	Lythrum junceum	Lythraceae	Seed
1033	Althaea cannabina	Malvaceae	Seed
1034	Lavatera trimestris	Malvaceae	Fruit
1035	Lavatera trimestris	Malvaceae	Fruit
1036	Malva silvestris	Malvaceae	Fruit
1037	Malva silvestris	Malvaceae	Fruit
1038	Oxalis cernua	Oxalidaceae	Seed
1039	Oxalis cernua	Oxalidaceae	Seed
1040	Oxalis corniculata	Oxalidaceae	Seed
1041	Oxalis corniculata	Oxalidaceae	Seed
1042	Chelidonium majus	Papaveraceae	Fruit
1043	Chelidonium majus	Papaveraceae	Fruit
1044	Glaucium corniculatum	Papaveraceae	Seed
1045	Glaucium corniculatum	Papaveraceae	Seed
1046	Hypecoum procumbens	Papaveraceae	Seed
1047	Hypecoum procumbens	Papaveraceae	Seed
1048	Papaver hybridum	Papaveraceae	Seed
1049	Papaver hybridum	Papaveraceae	Seed
1050	Papaver rhoeas	Papaveraceae	Seed
1051	Papaver rhoeas	Papaveraceae	Seed
1052	Roemeria hybrida	Papaveraceae	Seed
1053	Roemeria hybrida	Papaveraceae	Seed
1054	Coronilla scorpioides	Fabaceae	Seed
1055	Coronilla scorpioides	Fabaceae	Seed
1056	Hedysarum coronarium	Fabaceae	Seed
1057	Lathyrus aphaca	Fabaceae	Seed
1058	Lathyrus aphaca	Fabaceae	Seed
1059	Lathyrus ochrus	Fabaceae	Seed
1060	Lathyrus ochrus	Fabaceae	Seed
1061	Lotus corniculatus	Fabaceae	Seed
1062	Lotus corniculatus	Fabaceae	Seed
1063	Lupinus angustifolius	Fabaceae	Seed
1064	Lupinus luteus	Fabaceae	Seed
1065	Lupinus angustifolius	Fabaceae	Seed
1066	Lupinus luteus	Fabaceae	Seed
1067	Medicago arabica	Fabaceae	Seed
1068	Medicago arabica	Fabaceae	Seed
1069	Medicago sativa	Fabaceae	Seed
1070	Medicago sativa	Fabaceae	Seed
1071	Melilotus indica	Fabaceae	Seed
1072	Melilotus indica	Fabaceae	Seed
1073	Ornithopus compresus	Fabaceae	Seed
1074	Ornithopus compresus	Fabaceae	Seed
1075	Carex albonigra	Cyperaceae	Fruit
1076	Scorpiurus subvillosus	Fabaceae	Seed
1077	Scorpiurus subvillosus	Fabaceae	Seed
1078	Tetragonolobus purpureus	Fabaceae	Seed
1079	Tetragonolobus purpureus	Fabaceae	Seed
1080	Tetragonolobus siliquosus	Fabaceae	Seed
1081	Tetragonolobus siliquosus	Fabaceae	Seed
1082	Trifolium angustifolium	Fabaceae	Seed
1083	Trifolium angustifolium	Fabaceae	Seed
1084	Vicia sativa	Fabaceae	Seed
1085	Vicia sativa	Fabaceae	Seed
1086	Plantago lanceolata	Plantaginaceae	Seed
1087	Plantago lanceolata	Plantaginaceae	Seed
1088	Polygonum aviculare	Polygonaceae	Fruit
1089	Polygonum convolvulus	Polygonaceae	Fruit
1090	Polygonum convolvulus	Polygonaceae	Fruit
1091	Polygonum lapathifolium	Polygonaceae	Fruit
1092	Polygonum lapathifolium	Polygonaceae	Fruit
1093	Polygonum persicaria	Polygonaceae	Fruit
1094	Rumex crispus	Polygonaceae	Fruit
1095	Carex albonigra	Cyperaceae	Fruit
1096	Carex alma	Cyperaceae	Fruit
1097	Portulaca oleracea	Portulacaceae	Seed
1098	Portulaca oleracea	Portulacaceae	Seed
1099	Anagallis arvensis	Primulaceae	Seed
1100	Adonis aestivalis	Ranunculaceae	Fruit
1101	Delphinium peregrinum	Ranunculaceae	Seed
1102	Nigella arvensis	Ranunculaceae	Seed
1103	Nigella arvensis	Ranunculaceae	Seed
1104	Nigella damascena	Ranunculaceae	Seed
1105	Nigella hispanica	Ranunculaceae	Seed
1106	Nigella hispanica	Ranunculaceae	Seed
1107	Ranunculus arvensis	Ranunculaceae	Fruit
1108	Ranunculus arvensis	Ranunculaceae	Fruit
1109	Ranunculus muricatus	Ranunculaceae	Fruit
1110	Ranunculus muricatus	Ranunculaceae	Fruit
1111	Ranunculus sardous	Ranunculaceae	Fruit
1112	Ranunculus sardous	Ranunculaceae	Fruit
1113	Reseda luteola	Resedaceae	Seed
1114	Reseda luteola	Resedaceae	Seed
1115	Reseda phyteuma	Resedaceae	Seed
1116	Reseda phyteuma	Resedaceae	Seed
1117	Agrimonia eupatoria	Rosaceae	Fruit
1118	Agrimonia eupatoria	Rosaceae	Fruit
1119	Sanguisorba minor	Rosaceae	Fruit
1120	Sanguisorba minor	Rosaceae	Fruit
1121	Asperula arvensis	Rubiaceae	Fruit
1122	Asperula arvensis	Rubiaceae	Fruit
1123	Galium aparine	Rubiaceae	Fruit
1124	Galium tricorne	Rubiaceae	Fruit
1125	Galium tricorne	Rubiaceae	Fruit
1126	Linaria latifolia	Scrophulariaceae	Seed
1127	Linaria spuria	Scrophulariaceae	Seed
1128	Linaria spuria	Scrophulariaceae	Seed
1129	Veronica arvensis	Scrophulariaceae	Seed
1130	Veronica arvensis	Scrophulariaceae	Seed
1131	Veronica hederaefolia	Scrophulariaceae	Seed
1132	Veronica hederaefolia	Scrophulariaceae	Seed
1133	Datura stramonium	Solanaceae	Seed
1134	Datura stramonium	Solanaceae	Seed
1135	Solanum nigrum	Solanaceae	Seed
1136	Solanum nigrum	Solanaceae	Seed
1137	Ammi majus	Apiaceae	Fruit
1138	Ammi majus	Apiaceae	Fruit
1139	Ammi visnaga	Apiaceae	Fruit
1140	Ammi visnaga	Apiaceae	Fruit
1141	Bifora testiculata	Apiaceae	Fruit
1142	Bifora testiculata	Apiaceae	Fruit
1143	Bupleurum rotundifolium	Apiaceae	Fruit
1144	Bupleurum rotundifolium	Apiaceae	Fruit
1145	Carex alma	Cyperaceae	Fruit
1146	Coriandrum sativum	Apiaceae	Fruit
1147	Coriandrum sativum	Apiaceae	Fruit
1148	Daucus carota	Apiaceae	Fruit
1149	Daucus carota	Apiaceae	Fruit
1150	Daucus maximus	Apiaceae	Fruit
1151	Daucus maximus	Apiaceae	Fruit
1152	Carex amplifolia	Cyperaceae	Fruit
1153	Foeniculum vulgare	Apiaceae	Fruit
1154	Foeniculum vulgare	Apiaceae	Fruit
1155	Ridolfia segetum	Apiaceae	Fruit
1156	Ridolfia segetum	Apiaceae	Fruit
1157	Scandix pecten-veneris	Apiaceae	Fruit
1158	Scandix pecten-veneris	Apiaceae	Fruit
1159	Torilis anthriscus	Apiaceae	Fruit
1160	Torilis anthriscus	Apiaceae	Fruit
1161	Carex amplifolia	Cyperaceae	Fruit
1162	Carex angustata	Cyperaceae	Fruit
1163	Carex angustata	Cyperaceae	Fruit
1164	Urtica dioica	Urticaceae	Fruit
1165	Urtica dioca	Urticaceae	Fruit
1166	Fedia cornucopiae	Valerianaceae	Fruit
1167	Fedia cornucopiae	Valerianaceae	Fruit
1168	Verbena officinalis	Verbenaceae	Fruit
1169	Verbena officinalis	Verbenaceae	Fruit
1170	Carex aquatilis	Cyperaceae	Fruit
1171	Carex aquatilis	Cyperaceae	Fruit
1172	Zygophyllum fabago	Zygophyllaceae	Seed
1173	Zygophyllum fabago	Zygophyllaceae	Seed
1243	Carex arapahoensis	Cyperaceae	Fruit
1244	Carex arapahoensis	Cyperaceae	Fruit
1247	Digitaria sanguinalis	Poaceae	Fruit
1259	Setaria viridis	Poaceae	Fruit
1260	Setaria viridis	Poaceae	Fruit
1295	Potamogeton crispus	Potamogetonaceae	Fruit
1296	Potamogeton foliosus	Potamogetonaceae	Fruit
1297	Potamogeton nodosus	Potamogetonaceae	Fruit
1298	Potamogeton pusillus	Potamogetonaceae	Fruit
1299	Potamogeton richardsonii	Potamogetonaceae	Fruit
1300	Potamogeton richardsonii	Potamogetonaceae	Fruit
1301	Najas flexilis	Najadaceae	Seed
1302	Najas guadelupensis	Najadaceae	Seed
1303	Sagittaria latifolia	Alismataceae	Seed
1304	Sagittaria latifolia	Alismataceae	Seed
1305	Elodea canadensis	Hydrocharitaceae	Seed
1306	Elodea canadensis	Hydrocharitaceae	Seed
1307	Bromus commutatus	Poaceae	Fruit
1308	Bromus japonicus	Poaceae	Fruit
1309	Bromus secalinus	Poaceae	Fruit
1310	Cenchrus echinatus	Poaceae	Fruit
1311	Cenchrus echinatus	Poaceae	Fruit
1312	Cenchrus incertus	Poaceae	Fruit
1313	Cenchrus longispinus	Poaceae	Fruit
1314	Cenchrus longispinus	Poaceae	Fruit
1315	Digitaria sanguinalis	Poaceae	Fruit
1316	Eleusine indica	Poaceae	Fruit
1317	Hordeum jubatum	Poaceae	Fruit
1318	Paspalum dilatatum	Poaceae	Fruit
1319	Panicum dichotomiflorum	Poaceae	Fruit
1320	Paspalum distichum	Poaceae	Fruit
1321	Phalaris arundinacea	Poaceae	Fruit
1322	Phalaris arundinacea	Poaceae	Fruit
1323	Setaria faberi	Poaceae	Fruit
1324	Sorghum halepense	Poaceae	Fruit
1325	Sporobolus poiretii	Poaceae	Fruit
1326	Sporobolus poiretii	Poaceae	Fruit
1327	Carex lasiocarpa	Cyperaceae	Fruit
1329	Carex nebraskensis	Cyperaceae	Fruit
1330	Cyperus esculentus	Cyperaceae	Fruit
1331	Cyperus rotundus	Cyperaceae	Fruit
1332	Scirpus acutus	Cyperaceae	Fruit
1333	Heteranthera dubia	Pontederiaceae	Seed
1334	Heteranthera dubia	Pontederiaceae	Seed
1336	Cannabis sativa	Cannabinaceae	Fruit
1337	Urtica dioica	Urticaceae	Fruit
1338	Brunnichia cirrhosa	Polygonaceae	Fruit
1339	Brunnichia cirrhosa	Polygonaceae	Fruit
1340	Polygonum amphibium	Polygonaceae	Fruit
1341	Polygonum aviculare	Polygonaceae	Fruit
1342	Polygonum aviculare	Polygonaceae	Fruit
1343	Polygonum coccineum	Polygonaceae	Fruit
1344	Polygonum hydropiper	Polygonaceae	Fruit
1345	Polygonum hydropiper	Polygonaceae	Fruit
1346	Polygonum pensylvanicum	Polygonaceae	Fruit
1347	Polygonum persicaria	Polygonaceae	Fruit
1348	Rumex crispus	Polygonaceae	Fruit
1349	Chenopodium album	Chenopodiaceae	Fruit
1350	Chenopodium album	Chenopodiaceae	Fruit
1351	Halogeton glomeratus	Chenopodiaceae	Seed
1352	Kochia scoparia	Chenopodiaceae	Seed
1353	Salsola kali	Chenopodiaceae	Fruit
1354	Salsola kali	Chenopodiaceae	Fruit
1356	Alternanthera philoxeroides	Amaranthaceae	Seed
1357	Alternanthera philoxeroides	Amaranthaceae	Seed
1358	Amaranthus albus	Amaranthaceae	Seed
1359	Amaranthus blitoides	Amaranthaceae	Seed
1360	Amaranthus retroflexus	Amaranthaceae	Seed
1361	Amaranthus retroflexus	Amaranthaceae	Seed
1362	Phytolacca americana	Phytolaccaceae	Seed
1364	Mollugo verticillata	Aizoaceae	Seed
1365	Portulaca oleracea	Portulacaceae	Seed
1366	Agrostemma githago	Caryophyllaceae	Seed
1367	Agrostemma githago	Caryophyllaceae	Seed
1368	Cerastium arvense	Caryophyllaceae	Seed
1369	Cerastium arvense	Caryophyllaceae	Seed
1370	Cerastium vulgatum	Caryophyllaceae	Seed
1371	Lychnis alba	Caryophyllaceae	Seed
1372	Scleranthus annuus	Caryophyllaceae	Seed
1373	Scleranthus annuus	Caryophyllaceae	Seed
1374	Silene noctiflora	Caryophyllaceae	Seed
1375	Spergula arvensis	Caryophyllaceae	Seed
1376	Stellaria media	Caryophyllaceae	Seed
1377	Ceratophyllum demersum	Ceratophyllaceae	Fruit
1378	Nelumbo lutea	Nymphaeaceae	Seed
1379	Nuphar luteum	Nymphaeaceae	Seed
1380	Nuphar luteum	Nymphaeaceae	Seed
1383	Delphinium barbeyi	Ranunculaceae	Seed
1384	Delphinium barbeyi	Ranunculaceae	Seed
1387	Delphinium geyeri	Ranunculaceae	Seed
1388	Delphinium geyeri	Ranunculaceae	Seed
1389	Delphinium menziesii	Ranunculaceae	Seed
1390	Delphinium occidentale	Ranunculaceae	Seed
1391	Delphinium occidentale	Ranunculaceae	Seed
1392	Ranunculus acris	Ranunculaceae	Fruit
1393	Ranunculus repens	Ranunculaceae	Fruit
1394	Barbarea vulgaris	Brassicaceae	Seed
1395	Brassica kaber	Brassicaceae	Seed
1396	Brassica kaber	Brassicaceae	Seed
1397	Brassica nigra	Brassicaceae	Seed
1398	Camelina microcarpa	Brassicaceae	Seed
1399	Camelina microcarpa	Brassicaceae	Seed
1400	Capsella bursa-pastoris	Brassicaceae	Seed
1401	Capsella bursa-pastoris	Brassicaceae	Seed
1402	Cardaria draba	Brassicaceae	Seed
1403	Cardaria draba	Brassicaceae	Seed
1405	Conringia orientalis	Brassicaceae	Seed
1406	Conringia orientalis	Brassicaceae	Seed
1407	Descurainia pinnata	Brassicaceae	Seed
1408	Lepidium campestre	Brassicaceae	Seed
1409	Lepidium campestre	Brassicaceae	Seed
1410	Lepidium virginicum	Brassicaceae	Seed
1411	Nasturtium officinale	Brassicaceae	Seed
1412	Sisymbrium altissimum	Brassicaceae	Seed
1413	Sisymbrium altissimum	Brassicaceae	Seed
1414	Thlaspi arvense	Brassicaceae	Seed
1415	Potentilla canadensis	Rosaceae	Fruit
1417	Potentilla norvegica	Rosaceae	Fruit
1419	Potentilla recta	Rosaceae	Fruit
1421	Rosa multiflora	Rosaceae	Fruit
1422	Rosa multiflora	Rosaceae	Fruit
1423	Rubus allegheniensis	Rosaceae	Seed
1424	Astragalus mollissimus	Fabaceae	Seed
1425	Daubentonia punicea	Fabaceae	Seed
1430	Medicago lupulina	Fabaceae	Seed
1431	Oxtytropis lambertii	Fabaceae	Seed
1432	Pueraria lobata	Fabaceae	Seed
1433	Vicia angustifolia	Fabaceae	Seed
1434	Oxalis stricta	Oxalidaceae	Seed
1435	Croton capitatus	Euphorbiaceae	Seed
1436	Euphorbia corollata	Euphorbiaceae	Seed
1437	Euphorbia esula	Euphorbiaceae	Seed
1438	Euphorbia esula	Euphorbiaceae	Seed
1439	Euphorbia maculata	Euphorbiaceae	Seed
1440	Euphorbia maculata	Euphorbiaceae	Seed
1441	Euphorbia supina	Euphorbiaceae	Seed
1442	Rhus glabra	Anacardiaceae	Seed
1443	Rhus radicans	Anacardiaceae	Seed
1444	Rhus radicans	Anacardiaceae	Seed
1446	Rhus toxicodendron	Anacardiaceae	Seed
1449	Abutilon theophrasti	Malvaceae	Seed
1450	Malva neglecta	Malvaceae	Fruit
1451	Sida spinosa	Malvaceae	Seed
1452	Jussiaea decurrens	Onagraceae	Seed
1453	Myriophyllum exalbescens	Haloragidaceae	Fruit
1454	Myriophyllum exalbescens	Haloragidaceae	Fruit
1455	Myriophyllum spicatum	Haloragidaceae	Fruit
1456	Myriophyllum spicatum	Haloragidaceae	Fruit
1457	Cicuta maculata	Apiaceae	Fruit
1458	Apocynum cannabinum	Apocynaceae	Seed
1459	Apocynum cannabinum	Apocynaceae	Seed
1460	Asclepias syriaca	Asclepiadaceae	Seed
1461	Asclepias verticillata	Asclepiadaceae	Seed
1462	Convolvulus arvensis	Convolvulaceae	Seed
1463	Convolvulus sepium	Convolvulaceae	Seed
1464	Cuscuta approximata	Convolvulaceae	Seed
1468	Cuscuta indecora	Convolvulaceae	Seed
1469	Cuscuta indecora	Convolvulaceae	Seed
1470	Cuscuta pentagona	Convolvulaceae	Seed
1472	Ipomoea hederacea	Convolvulaceae	Seed
1473	Ipomoea purpurea	Convolvulaceae	Seed
1474	Lithospermum arvense	Boraginaceae	Fruit
1475	Verbena bracteata	Verbenaceae	Fruit
1477	Verbena stricta	Verbenaceae	Fruit
1478	Galeopsis tetrahit	Lamiaceae	Fruit
1479	Glechoma hederacea	Lamiaceae	Fruit
1480	Lamium amplexicaule	Lamiaceae	Fruit
1481	Datura stramonium	Solanaceae	Seed
1482	Physalis heterophylla	Solanaceae	Seed
1483	Solanum carolinense	Solanaceae	Seed
1484	Solanum nigrum	Solanaceae	Seed
1485	Solanum americanum	Solanaceae	Seed
1486	Linaria dalmatica	Scrophulariaceae	Seed
1487	Linaria vulgaris	Scrophulariaceae	Seed
1488	Linaria vulgaris	Scrophulariaceae	Seed
1489	Striga lutea	Scrophulariaceae	Seed
1490	Striga lutea	Scrophulariaceae	Seed
1492	Verbascum blattaria	Scrophulariaceae	Seed
1493	Verbascum thapsus	Scrophulariaceae	Seed
1494	Verbascum thapsus	Scrophulariaceae	Seed
1495	Veronica arvensis	Scrophulariaceae	Seed
1496	Veronica officinalis	Scrophulariaceae	Seed
1497	Veronica peregrina	Scrophulariaceae	Seed
1498	Campsis radicans	Bignoniaceae	Seed
1499	Orobanche minor	Orobanchaceae	Seed
1500	Orobanche minor	Orobanchaceae	Seed
1501	Plantago rugelii	Plantaginaceae	Seed
1502	Plantago lanceolata	Plantaginaceae	Seed
1503	Plantago major	Plantaginaceae	Seed
1504	Diodia teres	Rubiaceae	Fruit
1505	Galium aparine	Rubiaceae	Fruit
1506	Galium aparine	Rubiaceae	Fruit
1507	Galium mollugo	Rubiaceae	Fruit
1508	Lonicera japonica	Caprifoliaceae	Seed
1509	Dipsacus sylvestris	Dipsacaceae	Fruit
1510	Dipsacus sylvestris	Dipsacaceae	Fruit
1511	Achillea millefolium	Asteraceae	Seed
1512	Ambrosia artemisiifolia	Asteraceae	Seed
1513	Ambrosia psilostachya	Asteraceae	Seed
1514	Anthemis cotula	Asteraceae	Fruit
1515	Anthemis cotula	Asteraceae	Fruit
1516	Arctium minus	Asteraceae	Fruit
1517	Artemisia vulgaris	Asteraceae	Fruit
1518	Artemisia vulgaris	Asteraceae	Fruit
1519	Bidens bipinnata	Asteraceae	Fruit
1520	Bidens frondosa	Asteraceae	Fruit
1521	Centaurea diffusa	Asteraceae	Fruit
1522	Centaurea maculosa	Asteraceae	Fruit
1523	Centaurea repens	Asteraceae	Fruit
1525	Centaurea solstitialis	Asteraceae	Fruit
1526	Chrysanthemum leucanthemum	Asteraceae	Fruit
1527	Chrysothamnus nauseosus	Asteraceae	Fruit
1528	Chrysothamnus viscidiflorus	Asteraceae	Fruit
1529	Cichorium intybus	Asteraceae	Fruit
1530	Cirsium arvense	Asteraceae	Fruit
1531	Cirsium vulgare	Asteraceae	Fruit
1533	Conyza canadensis	Asteraceae	Fruit
1535	Erigeron annuus	Asteraceae	Fruit
1536	Erigeron annuus	Asteraceae	Fruit
1537	Eupatorium capillifolium	Asteraceae	Fruit
1538	Eupatorium rugosum	Asteraceae	Fruit
1539	Eupatorium rugosum	Asteraceae	Fruit
1541	Galinsoga parviflora	Asteraceae	Fruit
1542	Gutierrezia dracunculoides	Asteraceae	Fruit
1546	Haplopappus tenuisectus	Asteraceae	Fruit
1547	Helenium amarum	Asteraceae	Fruit
1548	Helianthus annuus	Asteraceae	Fruit
1549	Iva xanthifolia	Asteraceae	Fruit
1550	Lactuca serriola	Asteraceae	Fruit
1551	Senecio jacobaea	Asteraceae	Fruit
1552	Solidago canadensis	Asteraceae	Fruit
1553	Sonchus arvensis	Asteraceae	Fruit
1554	Sonchus asper	Asteraceae	Fruit
1555	Sonchus oleraceus	Asteraceae	Fruit
1556	Taraxacum officinale	Asteraceae	Fruit
1557	Taraxacum officinale	Asteraceae	Fruit
1559	Vernonia altissima	Asteraceae	Fruit
1560	Vernonia baldwinii	Asteraceae	Fruit
1561	Xanthium pensylvanicum	Asteraceae	Fruit
1562	Senecio jacobaea	Asteraceae	Fruit
1563	Senecio jacobaea	Asteraceae	Fruit
1564	Pinus taeda	Pinaceae	Seed
1566	Abies lasiocarpa	Pinaceae	Seed
1569	Juniperus virginiana	Pinaceae	Seed
1570	Typha latifolia	Typhaceae	Seed
1571	Sparganium eurycarpum	Sparganiaceae	Fruit
1572	Potamogeton diversifolius	Najadaceae	Fruit
1573	Potamogeton spirillus	Najadaceae	Fruit
1574	Potamogeton foliosus	Najadaceae	Fruit
1575	Potamogeton pusillus	Najadaceae	Fruit
1576	Potamogeton alpinus	Najadaceae	Fruit
1577	Potamogeton bupleuroides	Najadaceae	Fruit
1578	Potamogeton gramineus	Najadaceae	Fruit
1579	Potamogeton friesii	Najadaceae	Fruit
1580	Potamogeton obtusifolius	Najadaceae	Fruit
1581	Potamogeton filiformis	Najadaceae	Fruit
1582	Potamogeton richardsonii	Najadaceae	Fruit
1583	Potamogeton pulcher	Najadaceae	Fruit
1584	Potamogeton epihydrus	Najadaceae	Fruit
1585	Potamogeton vaginatus	Najadaceae	Fruit
1586	Potamogeton pectinatus	Najadaceae	Fruit
1587	Potamogeton nodosus	Najadaceae	Fruit
1588	Potamogeton ilinoensis	Najadaceae	Fruit
1589	Potamogeton natans	Najadaceae	Fruit
1590	Potamogeton amplifolius	Najadaceae	Fruit
1591	Potamogeton praelongus	Najadaceae	Fruit
1592	Potamogeton zosteriformis	Najadaceae	Fruit
1593	Panicum anceps	Poaceae	Fruit
1594	Setaria lutescens	Poaceae	Fruit
1595	Paspalum floridanum	Poaceae	Fruit
1596	Bromus commutatus	Poaceae	Fruit
1597	Echinochloa colonum	Poaceae	Fruit
1598	Zizaniopsis miliacea	Poaceae	Fruit
1599	Dactyloctenium aegyptium	Poaceae	Fruit
1600	Eleusine indica	Poaceae	Fruit
1601	Sporobolus cryptandrus	Poaceae	Fruit
1602	Cyperus filiculmis	Cyperaceae	Fruit
1604	Eleocharis albida	Cyperaceae	Fruit
1605	Fimbristylis castanea	Cyperaceae	Fruit
1606	Rhynchospora cymosa	Cyperaceae	Fruit
1607	Scirpus atrovirens	Cyperaceae	Fruit
1608	Scirpus acutus	Cyperaceae	Fruit
1609	Scleria verticillata	Cyperaceae	Fruit
1610	Claudium jamaicense	Cyperaceae	Fruit
1611	Carex lurida	Cyperaceae	Fruit
1613	Commelina crispa	Commelinaceae	Seed
1614	Tradescantia virginiana	Commelinaceae	Seed
1616	Juncus marginatus	Juncaceae	Seed
1618	Polygonatum commutatum	Liliaceae	Seed
1619	Maianthemum cadadense	Liliaceae	Seed
1620	Smilax glauca	Liliaceae	Seed
1621	Hypoxis hirsuta	Amaryllidaceae	Seed
1622	Sisyrinchium bellum	Iridaceae	Seed
1624	Carpinus caroliniana	Betulaceae	Fruit
1625	Betula lenta	Betulaceae	Fruit
1626	Alnus serrulata	Betulaceae	Fruit
1627	Celtis reticulata	Ulmaceae	Seed
1628	Celtis reticulata	Ulmaceae	Seed
1629	Morus alba	Moraceae	Fruit
1631	Urtica lyallii	Urticaceae	Fruit
1635	Rumex crispus	Polygonaceae	Fruit
1636	Polygonum punctatum	Polygonaceae	Fruit
1637	Polygonum virginianum	Polygonaceae	Fruit
1638	Polygonum sagittatum	Polygonaceae	Fruit
1639	Polygonum amphibium	Polygonaceae	Fruit
1640	Polygonum coccineum	Polygonaceae	Fruit
1641	Polygonum densiflorum	Polygonaceae	Fruit
1642	Polygonum punctatum	Polygonaceae	Fruit
1643	Polygonum persicaria	Polygonaceae	Fruit
1644	Polygonum persicaria	Polygonaceae	Fruit
1645	Polygonum hydropiperoides	Polygonaceae	Fruit
1646	Polygonum hydropiperoides	Polygonaceae	Fruit
1647	Polygonum hydropiper	Polygonaceae	Fruit
1648	Polygonum sagittatum	Polygonaceae	Fruit
1649	Polygonum pensylvanicum	Polygonaceae	Fruit
1650	Polygonum pensylvanicum	Polygonaceae	Fruit
1651	Polygonum longistylum	Polygonaceae	Fruit
1652	Polygonum longistylum	Polygonaceae	Fruit
1653	Polygonum arifolium	Polygonaceae	Fruit
1654	Polygonum lapathifolium	Polygonaceae	Fruit
1655	Polygonum orientale	Polygonaceae	Fruit
1656	Polygonum cilinode	Polygonaceae	Fruit
1657	Polygonum scandens	Polygonaceae	Fruit
1658	Polygonum dumetorum	Polygonaceae	Fruit
1659	Polygonum convolvulus	Polygonaceae	Fruit
1660	Polygonum douglasii	Polygonaceae	Fruit
1661	Polygonum virginianum	Polygonaceae	Fruit
1662	Polygonum ramosissimum	Polygonaceae	Fruit
1663	Polygonum aviculare	Polygonaceae	Fruit
1664	Polygonum erectum	Polygonaceae	Fruit
1665	Fagopyrum esculentum	Polygonaceae	Fruit
1666	Chenopodium capitatum	Chenopodiaceae	Fruit
1667	Chenopodium ambrosioides	Chenopodiaceae	Fruit
1668	Chenopodium album	Chenopodiaceae	Fruit
1670	Atriplex rosea	Chenopodiaceae	Seed
1672	Kochia scoparia	Chenopodiaceae	Seed
1673	Suaeda depressa	Chenopodiaceae	Seed
1674	Amaranthus retroflexus	Amaranthaceae	Seed
1675	Boerhaavia torreyana	Nyctaginaceae	Seed
1678	Phytolacca americana	Phytolaccaceae	Seed
1679	Mollugo verticillata	Aizoaceae	Seed
1680	Sesuvium maritimum	Aizoaceae	Seed
1682	Montia perfoliata	Portulacaceae	Seed
1683	Portulaca oleracea	Portulacaceae	Seed
1684	Spergula arvensis	Caryophyllaceae	Seed
1685	Agrostemma githago	Caryophyllaceae	Seed
1686	Stellaria media	Caryophyllaceae	Seed
1687	Cerastium viscosum	Caryophyllaceae	Seed
1688	Silene latifolia	Caryophyllaceae	Seed
1689	Lychnis alba	Caryophyllaceae	Seed
1690	Saponaria vaccaria	Caryophyllaceae	Seed
1691	Saponaria officinales	Caryophyllaceae	Seed
1692	Ceratophyllum demersum	Ceratophyllaceae	Fruit
1693	Nuphar luteum	Nymphaeaceae	Seed
1694	Nymphaea tuberosa	Nymphaeaceae	Seed
1696	Ranunculus lapponicus	Ranunculaceae	Fruit
1697	Ranunculus trichophyllus	Ranunculaceae	Fruit
1698	Ranunculus cymbalaria	Ranunculaceae	Fruit
1699	Delphinium geyeri	Ranunculaceae	Seed
1700	Anemone caroliniana	Ranunculaceae	Fruit
1701	Berberis aquifolium	Berberidaceae	Seed
1702	Cocculus carolinus	Menispermaceae	Seed
1707	Argemone platyceras	Papaveraceae	Seed
1708	Eschscholtzia californica	Papaveraceae	Seed
1709	Papaver dubium	Papaveraceae	Seed
1710	Papaver somniferum	Papaveraceae	Seed
1712	Cleome serrulata	Cleomaceae	Seed
1713	Capsella bursa-pastoris	Brassicaceae	Seed
1714	Barbarea vulgaris	Brassicaceae	Seed
1715	Barbarea verna	Brassicaceae	Seed
1716	Descurainia pinnata	Brassicaceae	Seed
1717	Descurainia pinnata	Brassicaceae	Seed
1720	Platanus occidentalis	Platanaceae	Fruit
1721	Platanus occidentalis	Platanaceae	Fruit
1722	Malus atrosanguinea	Rosaceae	Seed
1726	Amelanchier canadensis	Rosaceae	Seed
1727	Sorbus aucuparia	Rosaceae	Seed
1729	Cotoneaster pyracantha	Rosaceae	Seed
1730	Crataegus mollis	Rosaceae	Seed
1731	Rosa bracteata	Rosaceae	Fruit
1732	Rubus cuneifolius	Rosaceae	Fruit
1734	Fragaria chiloensis	Rosaceae	Fruit
1735	Potentilla monspeliensis	Rosaceae	Fruit
1736	Prosopis pubescens	Fabaceae	Seed
1737	Schrankia uncinata	Fabaceae	Seed
1738	Desmanthus illinoensis	Fabaceae	Seed
1739	Desmanthus leptolobus	Fabaceae	Seed
1740	Mimosa biuncifera	Fabaceae	Seed
1741	Cassia tora	Fabaceae	Seed
1742	Cassia ligustrina	Fabaceae	Seed
1743	Cassia occidentalis	Fabaceae	Seed
1744	Chamaecrista fasciculata	Fabaceae	Seed
1745	Crotalaria spectabilis	Fabaceae	Seed
1746	Medicago lupulina	Fabaceae	Seed
1747	Trifolium repens	Fabaceae	Seed
1748	Lotus crassifolius	Fabaceae	Seed
1749	Melilotus alba	Fabaceae	Seed
1750	Amorpha canescens	Fabaceae	Seed
1751	Indigofera caroliniana	Fabaceae	Seed
1752	Tephrosia virginiana	Fabaceae	Seed
1753	Sesbania macrocarpa	Fabaceae	Seed
1754	Robinia pseudoacacia	Fabaceae	Seed
1755	Astragalus brazoensis	Fabaceae	Seed
1756	Aeschynomene virginica	Fabaceae	Seed
1757	Desmodium tortuosum	Fabaceae	Seed
1758	Lespedeza repens	Fabaceae	Seed
1759	Apios tuberosa	Fabaceae	Seed
1760	Centrosema virginianum	Fabaceae	Seed
1761	Centrosema virginianum	Fabaceae	Seed
1762	Amphicarpa bracteata	Fabaceae	Seed
1763	Linum berlandieri	Linaceae	Seed
1764	Oxalis stricta	Oxalidaceae	Seed
1767	Polygala sanguinea	Polygonaceae	Seed
1768	Polygala grandiflora	Polygonaceae	Seed
1769	Croton punctatus	Euphorbiaceae	Seed
1770	Croton capitatus	Euphorbiaceae	Seed
1773	Acalypha virginica	Euphorbiaceae	Seed
1776	Euphorbia lathyrus	Euphorbiaceae	Seed
1777	Euphorbia vermiculata	Euphorbiaceae	Seed
1778	Euphorbia vermiculata	Euphorbiaceae	Seed
1779	Empetrum nigrum	Empetraceae	Seed
1780	Rhus glabra	Anacardiaceae	Seed
1782	Ilex verticillata	Aquifoliaceae	Fruit
1784	Euonymus atropurpureus	Celastraceae	Seed
1785	Impatiens biflora	Balsaminaceae	Seed
1786	Rhamnus alnifolia	Rhamnaceae	Seed
1787	Rhamnus cathartica	Rhamnaceae	Seed
1788	Rhamnus purshiana	Rhamnaceae	Seed
1792	Vitis aestivalis	Vitaceae	Seed
1794	Parthenocissus quinquefolia	Vitaceae	Seed
1797	Malvastrum exile	Malvaceae	Seed
1798	Sida rhombifolia	Malvaceae	Seed
1799	Hibiscus incanus	Malvaceae	Seed
1800	Melochia corchorifolia	Sterculiaceae	Seed
1801	Viola eriocarpa	Violaceae	Seed
1802	Passiflora incarnata	Passifloraceae	Seed
1805	Opuntia leptocaulis	Cactaceae	Seed
1806	Opuntia pollardi	Cactaceae	Seed
1814	Hippuris vulgaris	Haloragidaceae	Fruit
1815	Myriophyllum spicatum	Haloragidaceae	Fruit
1820	Hydrocotyle umbellata	Apiaceae	Fruit
1821	Daucus carota	Apiaceae	Fruit
1822	Cornus canadensis	Cornaceae	Seed
1823	Cornus amomum	Cornaceae	Seed
1824	Cornus florida	Cornaceae	Seed
1827	Arbutus menziesii	Ericaceae	Seed
1828	Arctostaphylos uva-ursi	Ericaceae	Seed
1829	Arctostaphylos andersonii	Ericaceae	Seed
1830	Arctostaphylos bicolor	Ericaceae	Seed
1831	Arbutus menziesii	Ericaceae	Seed
1833	Vaccinium angustifolium	Ericaceae	Seed
1834	Vaccinium macrocarpon	Ericaceae	Seed
1837	Fraxinus quadrangulata	Oleaceae	Seed
1838	Fraxinus excelsior	Oleaceae	Seed
1840	Ligustrum vulgare	Oleaceae	Seed
1842	Asclepias humistrata	Asclepiadaceae	Seed
1844	Teucrium canadense	Lamiaceae	Fruit
1846	Prunella vulgaris	Lamiaceae	Fruit
1847	Lamium amplexicaule	Lamiaceae	Fruit
1848	Solanum verbascifolium	Solanaceae	Seed
1849	Solanum dulcamara	Solanaceae	Seed
1850	Physalis heterophylla	Solanaceae	Seed
1851	Verbascum thapsus	Scrophulariaceae	Seed
1852	Linaria canadensis	Scrophulariaceae	Seed
1855	Bacopa acuminata	Scrophulariaceae	Seed
1856	Veronica anagallis-aquatica	Scrophulariaceae	Seed
1858	Sesamum indicum	Pedaliaceae	Seed
1859	Plantago rhodosperma	Plantaginaceae	Seed
1862	Diodia teres	Rubiaceae	Fruit
1863	Galium bermudense	Rubiaceae	Fruit
1864	Galium trifidum	Rubiaceae	Fruit
1865	Galium latifolium	Rubiaceae	Fruit
1866	Sambucus canadensis	Caprifoliaceae	Fruit
1867	Symphoricarpos orbiculatus	Caprifoliaceae	Seed
1868	Lonicera dioica	Caprifoliaceae	Seed
1869	Viburnum dentatum	Caprifoliaceae	Fruit
1871	Silybum marianum	Asteraceae	Fruit
1872	Cichorium intybus	Asteraceae	Fruit
1873	Carica papaya	Caricaceae	Seed
1874	Carica papaya	Caricaceae	Seed
1875	Passiflora quadrangularis	Passifloraceae	Seed
1876	Passiflora edulis	Passifloraceae	Seed
1877	Andansonia digitada	Bombacaceae	Seed
1878	Ceiba pentandra	Bombacaceae	Seed
1879	Helianthemum gorgoneum	Cistaceae	Seed
1881	Carex arcta	Cyperaceae	Fruit
1882	Carex arcta	Cyperaceae	Fruit
1883	Corchorus tridens	Tiliaceae	Seed
1884	Corchorus olitorius	Tiliaceae	Seed
1885	Corchorus depressus	Tiliaceae	Seed
1886	Corchorus trilocularis	Tiliaceae	Seed
1887	Diodia virginiana	Rubiaceae	Seed
1888	Dipsacus fullonum	Dipsacaceae	Fruit
1889	Echinochloa colonum	Poaceae	Fruit
1890	Erigeron philadelphicus	Asteraceae	Fruit
1891	Echinodorus cordifolius	Alismataceae	Seed
1892	Eclipta prostrata	Asteraceae	Fruit
1893	Eclipta prostrata	Asteraceae	Fruit
1894	Eleusine indica	Poaceae	Fruit
1895	Carex atherodes	Cyperaceae	Fruit
1896	Eriochloa contractra	Poaceae	Fruit
1897	Eriochloa gracilis	Poaceae	Fruit
1898	Eriochloa gracilis	Poaceae	Fruit
1899	Eriochloa villosa	Poaceae	Fruit
1900	Erysimum repandum	Brassicaceae	Seed
1901	Eupatorium capillifolium	Asteraceae	Fruit
1902	Euphorbia cyathophora	Euphorbiaceae	Seed
1903	Euphorbia cyathophora	Euphorbiaceae	Seed
1904	Euphorbia dentata	Euphorbiaceae	Seed
1905	Euphorbia dentata	Euphorbiaceae	Seed
1906	Euphorbia esula	Euphorbiaceae	Seed
1907	Euphorbia esula	Euphorbiaceae	Seed
1908	Euphorbia heterophylla	Euphorbiaceae	Seed
1909	Euphorbia heterophylla	Euphorbiaceae	Seed
1910	Euphorbia humistrata	Euphorbiaceae	Seed
1911	Euphorbia humistrata	Euphorbiaceae	Seed
1912	Euphorbia hyssopifolia	Euphorbiaceae	Seed
1913	Euphorbia maculata	Euphorbiaceae	Seed
1914	Euphorbia maculata	Euphorbiaceae	Seed
1915	Euphorbia marginata	Euphorbiaceae	Seed
1916	Euphorbia marginata	Euphorbiaceae	Seed
1917	Euphorbia nutans	Euphorbiaceae	Seed
1918	Flaveria trinervia	Asteraceae	Fruit
1919	Flaveria trinervia	Asteraceae	Fruit
1920	Galium aparine	Rubiaceae	Seed
1921	Galium aparine	Rubiaceae	Seed
1922	Geranium carolinianum	Geraniaceae	Seed
1923	Geranium carolinianum	Geraniaceae	Seed
1924	Geranium dissectum	Geraniaceae	Seed
1925	Geranium dissectum	Geraniaceae	Seed
1926	Glaucium corniculatum	Papaveraceae	Seed
1927	Glaucium corniculatum	Papaveraceae	Seed
1928	Helianthus annuus	Asteraceae	Fruit
1929	Helianthus annuus	Asteraceae	Fruit
1930	Helianthus ciliaris	Asteraceae	Fruit
1931	Helianthus ciliaris	Asteraceae	Fruit
1932	Helianthus tuberosus	Asteraceae	Fruit
1933	Helianthus tuberosus	Asteraceae	Fruit
1934	Heteranthera limosa	Pontederiaceae	Seed
1935	Heteranthera limosa	Pontederiaceae	Seed
1936	Heteranthera reniformis	Pontederiaceae	Seed
1937	Heteranthera reniformis	Pontederiaceae	Seed
1938	Hibiscus trionum	Malvaceae	Seed
1939	Hibiscus trionum	Malvaceae	Seed
1940	Hoffmanseggia glauca	Fabaceae	Seed
1941	Hoffmanseggia glauca	Fabaceae	Seed
1942	Hypericum perforatum	Clusiaceae	Seed
1943	Ipomoea coccinea	Convolvulaceae	Seed
1944	Grindelia squarrosa	Asteraceae	Fruit
1945	Ipomoea hederacea	Convolvulaceae	Seed
1946	Erodium cicutarium	Geraniaceae	Seed
1947	Ipomoea lacunosa	Convolvulaceae	Seed
1948	Fagopyrum tataricum	Polygonaceae	Fruit
1949	Ipomoea pandurata	Convolvulaceae	Seed
1950	Lactuca serriola	Asteraceae	Fruit
1951	Ipomoea purpurea	Convolvulaceae	Seed
1952	Ipomoea quamoclit	Convolvulaceae	Seed
1953	Ipomoea quamoclit	Convolvulaceae	Seed
1954	Ipomoea trichocarpa	Convolvulaceae	Seed
1955	Ipomoea turbinata	Convolvulaceae	Seed
1956	Ipomoea turbinata	Convolvulaceae	Seed
1957	Ipomoea wrightii	Convolvulaceae	Seed
1958	Jacquemontia tamnifolia	Convolvulaceae	Seed
1959	Kochia scoparia	Chenopodiaceae	Seed
1960	Lactuca floridana	Asteraceae	Fruit
1961	Lamium amplexicaule	Lamiaceae	Fruit
1962	Fimbristylis miliacea	Cyperaceae	Fruit
1963	Lamium purpureum	Lamiaceae	Fruit
1964	Lepidium virginicum	Brassicaceae	Seed
1965	Lithospermum arvense	Boraginaceae	Fruit
1966	Galinsoga ciliata	Lamiaceae	Fruit
1967	Lonicera japonica	Caprifoliaceae	Seed
1968	Lonicera japonica	Caprifoliaceae	Seed
1969	Malva neglecta	Malvaceae	Fruit
1970	Matricaria matricarioides	Asteraceae	Fruit
1971	Matricaria matricarioides	Asteraceae	Fruit
1972	Melochia corchorifolia	Sterculiaceae	Seed
1973	Mollugo verticillata	Aizoaceae	Seed
1974	Nicandra physalodes	Solanaceae	Seed
1975	Nicandra physalodes	Solanaceae	Seed
1976	Oenothera biennis	Onagraceae	Seed
1977	Oenothera biennis	Onagraceae	Seed
1978	Oenothera laciniata	Onagraceae	Seed
1979	Onopordum acanthium	Asteraceae	Fruit
1980	Oxalis stricta	Oxalidaceae	Seed
1981	Oxalis stricta	Oxalidaceae	Seed
1982	Panicum capillare	Poaceae	Fruit
1983	Panicum fasciculatum	Poaceae	Fruit
1984	Panicum miliaceum	Poaceae	Fruit
1985	Panicum miliaceum	Poaceae	Fruit
1986	Panicum texanum	Poaceae	Fruit
1987	Paspalum dilatatum	Poaceae	Fruit
1988	Paspalum notatum	Poaceae	Fruit
1989	Paspalum notatum	Poaceae	Fruit
1990	Paspalum urvillei	Poaceae	Fruit
1991	Passiflora incarnata	Passifloraceae	Seed
1992	Passiflora incarnata	Passifloraceae	Seed
1993	Phyllanthus urinaria	Euphorbiaceae	Seed
1994	Physalis angulata	Solanaceae	Seed
1995	Physalis angulata	Solanaceae	Seed
1996	Physalis heterophylla	Solanaceae	Seed
1997	Phytolacca americana	Phytolaccaceae	Seed
1998	Phytolacca americana	Phytolaccaceae	Seed
1999	Plantago lanceolata	Plantaginaceae	Seed
2000	Plantago lanceolata	Plantaginaceae	Seed
2001	Plantago rugelii	Plantaginaceae	Seed
2002	Plantago rugelii	Plantaginaceae	Seed
2003	Polygonum amphibium	Polygonaceae	Fruit
2004	Polygonum aviculare	Polygonaceae	Fruit
2005	Polygonum convolvulus	Polygonaceae	Fruit
2006	Polygonum convolvulus	Polygonaceae	Fruit
2007	Polygonum lapathifolium	Polygonaceae	Fruit
2008	Polygonum lapathifolium	Polygonaceae	Fruit
2009	Polygonum persicaria	Polygonaceae	Fruit
2010	Polygonum persicaria	Polygonaceae	Fruit
2011	Portulaca oleracea	Portulacaceae	Seed
2012	Portulaca oleracea	Portulacaceae	Seed
2013	Proboscidea louisianica	Martyniaceae	Seed
2014	Pueraria lobata	Fabaceae	Seed
2015	Pueraria lobata	Fabaceae	Seed
2016	Ranunculus sardous	Ranunculaceae	Fruit
2017	Raphanus raphanistrum	Brassicaceae	Seed
2018	Raphanus raphanistrum	Brassicaceae	Seed
2019	Rhus radicans	Anacardiaceae	Seed
2020	Solanum ptycanthum	Solanaceae	Seed
2021	Solanum ptycanthum	Solanaceae	Seed
2022	Solanum nigrum	Solanaceae	Seed
2023	Solanum sarrachoides	Solanaceae	Seed
2025	Trifolium repens	Fabaceae	Seed
2026	Trifolium repens	Fabaceae	Seed
2027	Datura stramonium	Solanaceae	Seed
2028	Datura stramonium	Solanaceae	Seed
2029	Sinapis alba	Brassicaceae	Seed
2030	Sinapis alba	Brassicaceae	Seed
2031	Amaranthus blitoides	Amaranthaceae	Seed
2032	Amaranthus blitoides	Amaranthaceae	Seed
2033	Chenopodium album	Chenopodiaceae	Fruit
2034	Chenopodium album	Chenopodiaceae	Fruit
2035	Digitaria sanguinalis	Poaceae	Fruit
2036	Digitaria sanguinalis	Poaceae	Fruit
2037	Reseda luteola	Resedaceae	Seed
2038	Reseda luteola	Resedaceae	Seed
2039	Capsella bursa-pastoris	Brassicaceae	Seed
2040	Capsella bursa-pastoris	Brassicaceae	Seed
2041	Stellaria media	Caryophyllaceae	Seed
2042	Stellaria media	Caryophyllaceae	Seed
2043	Sonchus oleraceus	Asteraceae	Fruit
2044	Sonchus oleraceus	Asteraceae	Fruit
2045	Richardia scabra	Rubiaceae	Seed
2046	Rosa multiflora	Rosaceae	Fruit
2047	Rosa multiflora	Rosaceae	Fruit
2048	Rumex crispus	Polygonaceae	Fruit
2049	Rumex obtusifolius	Polygonaceae	Fruit
2050	Rumex obtusifolius	Polygonaceae	Fruit
2051	Sagittaria graminea	Alismataceae	Fruit
2052	Sagittaria graminea	Alismataceae	Fruit
2053	Sagittaria latifolia	Alismataceae	Fruit
2054	Sagittaria latifolia	Alismataceae	Fruit
2055	Sagittaria montevidensis	Alismataceae	Fruit
2056	Sagittaria montevidensis	Alismataceae	Fruit
2057	Salsola iberica	Chenopodiaceae	Fruit
2058	Saururus cernuus	Saururaceae	Seed
2059	Saururus cernuus	Saururaceae	Seed
2060	Scirpus acutus	Cyperaceae	Fruit
2061	Scirpus mucronatus	Cyperaceae	Fruit
2062	Scoparia dulcis	Scrophulariaceae	Seed
2063	Scoparia dulcis	Scrophulariaceae	Seed
2064	Sesbania exaltata	Fabaceae	Seed
2065	Sesbania exaltata	Fabaceae	Seed
2066	Setaria faberi	Poaceae	Fruit
2067	Setaria faberi	Poaceae	Fruit
2068	Setaria geniculata	Poaceae	Fruit
2069	Setaria glauca	Poaceae	Fruit
2070	Setaria verticillata	Poaceae	Fruit
2071	Setaria verticillata	Poaceae	Fruit
2072	Sicyos angulatus	Cucurbitaceae	Seed
2073	Sicyos angulatus	Cucurbitaceae	Seed
2074	Silene alba	Caryophyllaceae	Seed
2075	Silene alba	Caryophyllaceae	Seed
2076	Silene noctiflora	Caryophyllaceae	Seed
2077	Silene noctiflora	Caryophyllaceae	Seed
2078	Sisymbrium altissimum	Brassicaceae	Seed
2079	Sisymbrium altissimum	Brassicaceae	Seed
2080	Sisymbrium irio	Brassicaceae	Seed
2081	Sisymbrium irio	Brassicaceae	Seed
2082	Solanum americanum	Solanaceae	Seed
2083	Solanum americanum	Solanaceae	Seed
2084	Solanum carolinense	Solanaceae	Seed
2085	Solanum carolinense	Solanaceae	Seed
2086	Solanum elaeagnifolium	Solanaceae	Seed
2087	Solanum elaeagnifolium	Solanaceae	Seed
2088	Solanum nigrum	Solanaceae	Seed
2089	Solanum nigrum	Solanaceae	Seed
2090	Solanum ptycanthum	Solanaceae	Seed
2091	Solanum ptycanthum	Solanaceae	Seed
2092	Solanum rostratum	Solanaceae	Seed
2093	Solanum sarrachoides	Solanaceae	Seed
2094	Solanum sarrachoides	Solanaceae	Seed
2095	Sphenoclea zeylandica	Sphenocleaceae	Seed
2096	Sphenoclea zeylandica	Sphenocleaceae	Seed
2097	Stellaria media	Caryophyllaceae	Seed
2098	Stellaria media	Caryophyllaceae	Seed
2099	Thlaspi arvense	Brassicaceae	Seed
2100	Thlaspi arvense	Brassicaceae	Seed
2101	Trianthema portulacastrum	Aizoaceae	Seed
2102	Trianthema portulacastrum	Aizoaceae	Seed
2103	Vaccaria pyramidata	Caryophyllaceae	Seed
2104	Vaccaria pyramidata	Caryophyllaceae	Seed
2105	Verbascum blattaria	Scrophulariaceae	Seed
2106	Verbascum blattaria	Scrophulariaceae	Seed
2107	Verbascum thapsus	Scrophulariaceae	Seed
2108	Verbascum thapsus	Scrophulariaceae	Seed
2109	Vicia angustifolia	Fabaceae	Seed
2110	Vicia angustifolia	Fabaceae	Seed
2111	Vicia villosa	Fabaceae	Seed
2112	Vicia villosa	Fabaceae	Seed
2113	Vigna unguiculata	Fabaceae	Seed
2114	Vigna unguiculata	Fabaceae	Seed
2115	Abelmoschus esculentus	Malvaceae	Seed
2116	Abelmoschus esculentus	Malvaceae	Seed
2117	Abutilon theophrasti	Malvaceae	Seed
2118	Abutilon theophrasti	Malvaceae	Seed
2119	Carex atherodes	Cyperaceae	Fruit
2120	Carex athrostachya	Cyperaceae	Fruit
2121	Carex athrostachya	Cyperaceae	Fruit
2122	Carex atrosquama	Cyperaceae	Fruit
2123	Acalypha ostryifolia	Euphorbiaceae	Seed
2124	Acalypha ostryifolia	Euphorbiaceae	Seed
2125	Acalypha virginica	Euphorbiaceae	Seed
2126	Acalypha virginica	Euphorbiaceae	Seed
2127	Achillea millefolium	Asteraceae	Fruit
2128	Achillea millefolium	Asteraceae	Fruit
2129	Aeschynomene indica	Fabaceae	Seed
2130	Aeschynomene indica	Fabaceae	Seed
2131	Aeschynomene virginica	Fabaceae	Seed
2132	Aeschynomene virginica	Fabaceae	Seed
2133	Allium canadense	Liliaceae	Seed
2134	Allium canadense	Liliaceae	Seed
2135	Amaranthus albus	Amaranthaceae	Seed
2136	Amaranthus albus	Amaranthaceae	Seed
2137	Amaranthus blitoides	Amaranthaceae	Seed
2138	Amaranthus gracilis	Amaranthaceae	Seed
2139	Amaranthus gracilis	Amaranthaceae	Seed
2140	Amaranthus palmeri	Amaranthaceae	Seed
2141	Amaranthus palmeri	Amaranthaceae	Seed
2142	Amaranthus powellii	Amaranthaceae	Seed
2143	Amaranthus retroflexus	Amaranthaceae	Seed
2144	Amaranthus retroflexus	Amaranthaceae	Seed
2145	Amaranthus spinosus	Amaranthaceae	Seed
2146	Amaranthus spinosus	Amaranthaceae	Seed
2147	Amaranthus tuberculatus	Amaranthaceae	Seed
2148	Ambrosia trifida	Asteraceae	Fruit
2149	Ambrosia trifida	Asteraceae	Fruit
2150	Ammannia coccinea	Lythraceae	Seed
2151	Ammannia coccinea	Lythraceae	Seed
2152	Ampelopsis arborea	Vitaceae	Seed
2153	Ampelopsis arborea	Vitaceae	Seed
2154	Amsinkia intermedia	Boraginaceae	Fruit
2155	Amsinkia intermedia	Boraginaceae	Fruit
2156	Anoda cristata	Malvaceae	Seed
2157	Anoda cristata	Malvaceae	Seed
2158	Anthemis cotula	Asteraceae	Fruit
2159	Anthemis cotula	Asteraceae	Fruit
2160	Arctium minus	Asteraceae	Fruit
2161	Arctium minus	Asteraceae	Fruit
2162	Argemone mexicana	Papaveraceae	Seed
2163	Argemone mexicana	Papaveraceae	Seed
2164	Bacopa rotundifolia	Scrophulariaceae	Seed
2165	Bacopa rotundifolia	Scrophulariaceae	Seed
2166	Barbarea vulgaris	Brassicaceae	Seed
2167	Barbarea vulgaris	Brassicaceae	Seed
2168	Brassica kaber	Brassicaceae	Seed
2169	Brassica kaber	Brassicaceae	Seed
2170	Brassica rapa	Brassicaceae	Seed
2171	Brassica rapa	Brassicaceae	Seed
2172	Buchloe dactyloides	Poaceae	Fruit
2173	Buchloe dactyloides	Poaceae	Fruit
2174	Calystegia sepium	Convolvulaceae	Seed
2175	Calystegia sepium	Convolvulaceae	Seed
2176	Cannabis sativa	Cannabinaceae	Fruit
2177	Cannabis sativa	Cannabinaceae	Fruit
2178	Caperonia palustris	Euphorbiaceae	Seed
2179	Caperonia palustris	Euphorbiaceae	Seed
2180	Capsella bursa-pastoris	Brassicaceae	Seed
2181	Capsella bursa-pastoris	Brassicaceae	Seed
2182	Cardamine parviflora	Brassicaceae	Seed
2183	Cardamine parviflora	Brassicaceae	Seed
2184	Cardaria draba	Brassicaceae	Seed
2185	Cardaria draba	Brassicaceae	Seed
2186	Cardiospermum halicacabum	Sapindaceae	Seed
2187	Carduus nutans	Asteraceae	Fruit
2188	Cassia fasciculata	Fabaceae	Seed
2189	Cassia fasciculata	Fabaceae	Seed
2190	Cassia obtusifolia	Fabaceae	Seed
2191	Cassia obtusifolia	Fabaceae	Seed
2192	Cassia occidentalis	Fabaceae	Seed
2193	Cassia occidentalis	Fabaceae	Seed
2194	Cerastium vulgatum	Caryophyllaceae	Seed
2195	Cerastium vulgatum	Caryophyllaceae	Seed
2196	Chenopodium album	Chenopodiaceae	Seed
2197	Chenopodium album	Chenopodiaceae	Seed
2198	Chenopodium ambrosioides	Chenopodiaceae	Seed
2199	Chenopodium ambrosioides	Chenopodiaceae	Seed
2200	Chenopodium leptophyllum	Chenopodiaceae	Seed
2201	Chorispora tenella	Brassicaceae	Seed
2202	Chorispora tenella	Brassicaceae	Seed
2203	Cichorium intybus	Asteraceae	Fruit
2204	Cichorium intybus	Asteraceae	Fruit
2205	Cirsium arvense	Asteraceae	Fruit
2206	Cirsium arvense	Asteraceae	Fruit
2207	Cirsium discolor	Asteraceae	Fruit
2208	Cirsium discolor	Asteraceae	Fruit
2209	Cirsium vulgare	Asteraceae	Fruit
2210	Cirsium vulgare	Asteraceae	Fruit
2211	Citrullus lanatus	Cucurbitaceae	Seed
2212	Citrullus lanatus	Cucurbitaceae	Seed
2213	Cocculus carolinus	Menispermaceae	Seed
2214	Cocculus carolinus	Menispermaceae	Seed
2215	Commelina communis	Commelinaceae	Seed
2216	Commelina communis	Commelinaceae	Seed
2217	Commelia diffusa	Commelinaceae	Seed
2218	Commelia diffusa	Commelinaceae	Seed
2219	Convolvulus arvensis	Convolvulaceae	Seed
2220	Convolvulus arvensis	Convolvulaceae	Seed
2221	Coreopsis tinctoria	Asteraceae	Fruit
2222	Coreopsis tinctoria	Asteraceae	Fruit
2223	Crotalaria spectabilis	Fabaceae	Seed
2224	Crotalaria spectabilis	Fabaceae	Seed
2225	Croton capitatus	Euphorbiaceae	Seed
2226	Croton capitatus	Euphorbiaceae	Seed
2227	Croton glandulosus	Euphorbiaceae	Seed
2228	Croton glandulosus	Euphorbiaceae	Seed
2229	Ampelamus albidus	Asclepiadaceae	Seed
2230	Apocynum cannabinum	Asclepiadaceae	Seed
2231	Cucumis melo	Cucurbitaceae	Seed
2232	Cucumis melo	Cucurbitaceae	Seed
2233	Cucurbita foetidissima	Cucurbitaceae	Seed
2234	Cucurbita foetidissima	Cucurbitaceae	Seed
2235	Cucurbita texana	Cucurbitaceae	Seed
2236	Cucurbita texana	Cucurbitaceae	Seed
2237	Cynodon dactylon	Poaceae	Fruit
2238	Cynodon dactylon	Poaceae	Fruit
2239	Cyperus compressus	Cyperaceae	Fruit
2240	Cyperus difformis	Cyperaceae	Fruit
2241	Cyperus difformis	Cyperaceae	Fruit
2242	Cyperus erythorhizos	Cyperaceae	Fruit
[truncated: 11,904 more rows]
